# Supplementary material for: Rationale and study design of the Adaptive study of IL-2 dose on regulatory T cells in type 1 diabetes (DILT1D): a non-randomised, open label, adaptive dose finding trial
Source: PubMed Central journal article supplement (PMC4054640; doi:10.1136/bmjopen-2014-005559), 2014-06-04
Supplement: bmjopen-2014-005559.draft_revisions.pdf [file bmjopen-2014-005559.draft_revisions.pdf]

# BMJ Open

## Rationale and study design of the Adaptive study of IL-2 dose on regulatory T cells in type 1 diabetes (DILT1D)

|                                 |                                                                                                                                                                                                                                                                                                                                                                                                                                                                                                                                                                                                                                                                                                                                                                                                                                                                                                                                                                       |
|---------------------------------|-----------------------------------------------------------------------------------------------------------------------------------------------------------------------------------------------------------------------------------------------------------------------------------------------------------------------------------------------------------------------------------------------------------------------------------------------------------------------------------------------------------------------------------------------------------------------------------------------------------------------------------------------------------------------------------------------------------------------------------------------------------------------------------------------------------------------------------------------------------------------------------------------------------------------------------------------------------------------|
| Journal:                        | <i>BMJ Open</i>                                                                                                                                                                                                                                                                                                                                                                                                                                                                                                                                                                                                                                                                                                                                                                                                                                                                                                                                                       |
| Manuscript ID:                  | bmjopen-2014-005559                                                                                                                                                                                                                                                                                                                                                                                                                                                                                                                                                                                                                                                                                                                                                                                                                                                                                                                                                   |
| Article Type:                   | Protocol                                                                                                                                                                                                                                                                                                                                                                                                                                                                                                                                                                                                                                                                                                                                                                                                                                                                                                                                                              |
| Date Submitted by the Author:   | 29-Apr-2014                                                                                                                                                                                                                                                                                                                                                                                                                                                                                                                                                                                                                                                                                                                                                                                                                                                                                                                                                           |
| Complete List of Authors:       | Waldron-Lynch, Frank; University of Cambridge, JDRF/Wellcome Trust Diabetes & Inflammation Laboratory, Cambridge Institute for Medical Research<br>Kareclas, Paula; Cambridge University Hospitals NHS Foundation Trust, Cambridge Clinical Trials Unit<br>Irons, Kathryn; Cambridge University Hospitals NHS Foundation Trust, Cambridge Clinical Trials Unit<br>Walker, Neil; University of Cambridge, JDRF/Wellcome Trust Diabetes & Inflammation Laboratory Cambridge Institute for Medical Research<br>Mander, Adrian; Institute of Public Health, MRC Biostatistics Unit<br>Wicker, Linda; University of Cambridge, JDRF/Wellcome Trust Diabetes & Inflammation Laboratory Cambridge Institute for Medical Research<br>Todd, John; University of Cambridge, JDRF/Wellcome Trust Diabetes & Inflammation Laboratory Cambridge Institute for Medical Research<br>Bond, Simon; Cambridge University Hospitals NHS Foundation Trust, Cambridge Clinical Trials Unit |
| <b>Primary Subject Heading</b>: | Diabetes and endocrinology                                                                                                                                                                                                                                                                                                                                                                                                                                                                                                                                                                                                                                                                                                                                                                                                                                                                                                                                            |
| Secondary Subject Heading:      | Immunology (including allergy), Pharmacology and therapeutics                                                                                                                                                                                                                                                                                                                                                                                                                                                                                                                                                                                                                                                                                                                                                                                                                                                                                                         |
| Keywords:                       | Immunology < BASIC SCIENCES, Clinical trials < THERAPEUTICS, General diabetes < DIABETES & ENDOCRINOLOGY                                                                                                                                                                                                                                                                                                                                                                                                                                                                                                                                                                                                                                                                                                                                                                                                                                                              |
|                                 |                                                                                                                                                                                                                                                                                                                                                                                                                                                                                                                                                                                                                                                                                                                                                                                                                                                                                                                                                                       |

SCHOLARONE™  
Manuscripts

**Title**

Rationale and study design of the Adaptive study of **IL**-2 dose on regulatory T cells in **type 1 diabetes (DILT1D)**

Frank Waldron-Lynch<sup>1\*</sup>, Paula Kareclas<sup>2</sup>, Kathryn Irons<sup>2</sup>, Neil Walker<sup>1</sup>, Adrian Mander<sup>3</sup>, Linda Wicker<sup>1</sup>, John Todd<sup>1</sup>, Simon Bond<sup>2</sup>.

<sup>1</sup>JDRF/Wellcome Trust Diabetes & Inflammation Laboratory, Cambridge Institute for Medical Research, University of Cambridge, Addenbrooke's Hospital, Hills Road, Cambridge CB2 0XY, United Kingdom.

<sup>2</sup>Cambridge Clinical Trials Unit, Cambridge University Hospitals NHS Foundation Trust, Addenbrooke's Hospital, Hills Road, Cambridge, CB2 0QQ, United Kingdom.

<sup>3</sup>MRC Biostatistics Unit, Cambridge Institute of Public Health, Forvie Site, Robinson Way, Cambridge CB2 0SR, United Kingdom.

**\*Corresponding author**

Dr Frank Waldron-Lynch,

JDRF/Wellcome Trust Diabetes & Inflammation Laboratory, Cambridge Institute for Medical Research, University of Cambridge, Addenbrooke's Hospital, Hills Road, Cambridge CB2 0XY, United Kingdom.

Email: [frank.waldron-lynch@cimr.cam.ac.uk](mailto:frank.waldron-lynch@cimr.cam.ac.uk).

Telephone: +447872410617

Fax: +441223762102

**Keywords**

Type 1 diabetes, Interleukin-2, Clinical trials, Regulatory T cells, Immunomodulation

**Word count**

3695

## Abstract

**Introduction:** CD4<sup>+</sup> regulatory T cells (Tregs) are crucial for the maintenance of self-tolerance and are deficient in many common autoimmune diseases such as type 1 diabetes (T1D). Interleukin-2 (IL-2) plays a major role in the activation and function of Tregs and treatment with ultra low dose (ULD) IL-2 could increase Treg function to potentially halt disease progression in T1D. However prior to embarking on large phase II/III clinical trials it is critical to develop new strategies for determining the mechanism of action of ULD IL-2 in participants with T1D. In this mechanistic study we will combine a novel trial design with a clinical grade Treg assay to identify the best doses of ULD IL-2 to induce targeted increases in Tregs.

**Method and analysis:** DILT1D is a single centre non-randomised, single dose, open label, adaptive dose finding trial. The primary objective of DILT1D is to identify the best doses of IL-2 to achieve a minimal or maximal Treg increase in participants with T1D (N=40). The design has an initial learning phase where pairs of patients are assigned to five pre-assigned doses followed by an interim analysis to determine the two Treg targets for the remainder of the trial. This will then be followed by an adaptive phase which is fully sequential with an interim analysis after each patient to determine the choice of dose based on the optimality criterion to minimise the determinant of the covariance of the estimated target doses. A Dose Determining Committee (DDC) will review all data available at the interim(s) and then provide decisions regarding the choice of dose to administer to subsequent participants.

**Ethics and dissemination:** Ethical approval for the study was granted 18th February 2013. Results of this study will be reported through peer reviewed journals, conference presentations and an internal organisational report.

**Trial registration numbers** NCT01827735, ISRCTN27852285, DRN767

**Strengths and limitations of this study**

This is an adaptive dose finding trial that combines a new trial design with the use of immunological biomarkers to develop a new treatment for type 1 diabetes.

The study incorporates detailed experimental medicine mechanistic studies that will investigate the actions of ultra low dose IL-2 on the human immune system.

The adaptive study design has required the development of new trial governance structures to allow data generated in the study to be rapidly analysed and utilised to inform dosing decisions.

The study did not aim to determine the metabolic effects of treatment.

For peer review only

## Introduction

Type 1 diabetes (T1D) is the most common severe chronic autoimmune disease worldwide. The incidence of type 1 diabetes is rising rapidly with a predicted increase in paediatric cases of 70% over the next 15 year in Europe[1]. The aetiology of type 1 diabetes is the autoimmune (loss of self tolerance) mediated destruction of the insulin producing pancreatic beta cells leading to insulin deficiency and development of hyperglycaemia[2]. At present, medical management of T1D focuses on intensive insulin replacement therapy to limit microvascular complications (retinopathy, nephropathy, neuropathy). Despite incremental improvement over the last 90 years clinical outcomes remain suboptimal with fewer than 5% of patients in the intensively treated group of the pivotal Diabetes Control and Complications Trial achieving glycaemic targets[3]. The limiting factor for achieving euglycemia was hypoglycaemia as a result of exogenous insulin treatment. That is the tighter the glycaemic control the greater the frequency of hypoglycaemia[4]. However, patients who had residual endogenous insulin function had a reduced level of microvascular complications and hypoglycaemia, which was most likely due to the preservation of the counter regulator responses to low blood sugars[5]. These findings have led intensive efforts to arrest the autoimmune process by novel immunotherapy and thereby preserve residual insulin production leading to improved clinical outcomes in type 1 diabetes.

Genome wide association studies have found that most genes contributing to T1D susceptibility encode proteins involved in immune regulation and immune function[6]. In particular, several of the proteins are part of the interleukin 2 (IL-2) pathway that regulates T cell activation and tolerance to self antigens: IL-2, CD25, the alpha chain of the IL-2 receptor (*IL2RA*), BACH2 and protein tyrosine phosphatase non-receptor type 2 (PTPN2)[7]. Phenotypic characterisation of CD25 expression on CD4 T cell subsets has demonstrated that individuals carrying susceptibility alleles at *IL2RA* have memory CD4 T cells with reduced CD25 expression and less production of IL-2 upon activation[8]. Physiologically, IL-2 expression and signalling via the high affinity trimeric IL-2 receptor is essential for the maintenance of self tolerance and the prevention of autoimmunity[9].

Treg and T effector (Teff) cells differ in their abilities to respond to IL-2 due to their distinct CD25 levels and the balance of their intracellular signalling molecules. In response to IL-2, Tregs intracellularly signal primarily via the pSTAT5 pathway while Teffs also activate the MAPK and PI3K/AKT pathways[10 11]. Importantly, Tregs have a greater sensitivity to IL-2 due to their higher expression of the high affinity IL-2 receptor compared to Teff cells. Natural killer (NK) cells also require higher concentrations of IL-2 to be activated since this subset primarily expresses the intermediate affinity IL-2 receptor that is composed of dimers of the beta and gamma chains[12]. The higher sensitivity of Tregs for IL-2 opens a therapeutic window where ultra low doses of IL-2 therapy can be used to enhance Treg responses in patients with T1D.

Aldesleukin or Proleukin is a human recombinant IL-2 product produced by recombinant DNA technology using a genetically engineered *E. coli* strain expressing an analogue of the human IL-2 gene. The *in vitro* biological activities of the native non-recombinant compound have been reproduced with aldesleukin[13]. Aldesleukin is produced by Prometheus Laboratories on behalf of Novartis Vaccine and Diagnostics.

1  
2  
3 High dose aldesleukin is currently indicated for the treatment of adults with  
4 metastatic renal cell cancer (RCC)[14] and metastatic melanoma skin cancer[15].  
5 Initial clinical trials in metastatic RCC administered intravenously  $18 \times 10^6$  IU of  
6 aldesleukin every 8 hours for a maximum of 14 days. Following 9 days of rest a  
7 further 14 doses were administered. Less than 10% of patients had a complete  
8 response to IL-2 therapy[16]. Alternative regimens with subcutaneous aldesleukin  
9 have also been used. Aldesleukin is administered at  $18 \times 10^6$  IU every day for 5  
10 days, followed by 2 days of rest. For the following 3 weeks  $18 \times 10^6$  IU is  
11 administered on days 1 and 2 of each week followed by  $9 \times 10^6$  IU on days 3-5. On  
12 days 6 and 7 no drug is administered. After 1 week rest this 4 week cycle is  
13 repeated[16]. The reduced dose regimens, though minimising side effects, yield  
14 substantially lower clinical responses than the high dose protocol and are not  
15 considered effective treatment of metastatic renal cell carcinoma[17].  
16

17  
18 In patients with HIV, clinical trials of aldesleukin therapy have been conducted to  
19 determine if increasing the CD4<sup>+</sup> T cell count would improve clinical outcomes  
20 (opportunistic disease or death from any cause). The Subcutaneous Recombinant  
21 Interleukin-2 in HIV Patients with Low CD4<sup>+</sup> Counts under Active Antiretroviral  
22 Therapy (SILCAAT) trial administered a dose of  $4.5 \times 10^6$  IU twice daily for 5 days  
23 for six cycles with each cycle 8 weeks apart. The Evaluation of Subcutaneous  
24 Proleukin in a Randomized International Trial (ESPRIT) delivered  $7.5 \times 10^6$  IU twice  
25 daily for 5 days for 3 cycles with each cycle 8 weeks apart. In both trials  
26 aldesleukin induced an increase in CD4<sup>+</sup> cell count as compared to antiretroviral  
27 therapy alone. However, no additional clinical benefit was observed in the  
28 aldesleukin plus antiretroviral therapy groups. Neither the SILCAAT nor ESPRIT trial  
29 included a mechanistic analysis so it is unclear if the aldesleukin therapy induced a  
30 population of Tregs that may have blunted the Teff function[18].  
31  
32

33 A combination phase 1 trial of rapamycin and aldesleukin in recently diagnosed  
34 patients with T1D has been reported. The rationale for this combination originated  
35 from murine studies where rapamycin and IL-2 had been shown to prevent diabetes  
36 but not to reverse it in the NOD model[19]. Additional data from other murine  
37 models suggested that rapamycin selectively inhibits Teff function as compared to  
38 Treg function[20]. Rapamycin was administered at 2 mg per day for 7 days  
39 followed by a dose adjustment to achieve a serum level of 5-10 ng/ml for 12 weeks.  
40 Aldesleukin was commenced concurrently and administered subcutaneously at  $4.5 \times$   
41  $10^6$  IU once a day for 3 days for 4 cycles. The combination treatment resulted in  
42 a transient decrease in pancreatic beta function (as measured by C-peptide decline)  
43 that resolved after discontinuation of the rapamycin. As preservation of residual  
44 insulin production in the pancreas is critical to improved clinical outcomes, further  
45 studies in patients with T1D should avoid combining rapamycin and IL-2[21].  
46  
47

48 Two recent successful trials of low dose aldesleukin in Graft versus Host Disease  
49 (GVHD) and Hepatitis C virus (HCV) induced Vasculitis (VASCU-IL2) have been  
50 reported. Patients with chronic GVHD who were resistant to glucocorticoid therapy were  
51 treated with either  $0.3 \times 10^6$ ,  $1 \times 10^6$  or  $3 \times 10^6$  IU/m<sup>2</sup>/day of aldesleukin for 8  
52 weeks. The numbers of CD4 Tregs increased in all patients without an increase in  
53 Teff cells. Patients had sustained clinical responses with extended therapy and this  
54 enabled tapering of glucocorticoids[22]. HCV vasculitis patients were treated with  $1.5$   
55  $\times 10^6$  IU once a day for 5 days followed by  $3 \times 10^6$  IU for 5 days for three cycles  
56 on weeks 3, 6 and 9. The proportion of Treg cells increased during treatment  
57 without an increase in Teff cells. Increased natural killer cells and an eosinophilia  
58  
59  
60

1  
2  
3 were also noted with aldesleukin treatment. Overall patients with HCV vasculitis, an  
4 autoimmune condition, demonstrated clinical improvement on this regimen[23].  
5

6 There is substantial non-clinical, preclinical and clinical data that IL-2 (aldesleukin)  
7 therapy can arrest the autoimmune mediated destruction of pancreatic beta cells by  
8 induction of functional Tregs that inhibit islet specific autoreactive T cells. However,  
9 prior to embarking on large proof of concept trials in type 1 diabetes it is essential  
10 that the dose of IL-2 that induces an increase in Treg population while resolving  
11 qualitative defects is determined.  
12

## 13 14 15 **Methods**

### 16 17 **Study design**

18  
19 The DILT1D study is a 9 week, single centre non-randomised, single dose, open  
20 label, adaptive dose finding trial. The study includes 11 visits: a screening visit, a  
21 treatment day, four visits to monitor the response to a dose of ultra low dose IL-2,  
22 four visits to monitor the duration of response, and a final follow up visit on day 60  
23 (Figure 1). The DILT1D study has two phases: a learning phase and an adaptive  
24 phase. At the start of the study (learning phase) the first ten participants will receive  
25 doses 0.04, 0.16, 0.6, 1,  $1.5 \times 10^6$  IU/m<sup>2</sup> of IL-2, in ascending order with each of  
26 the doses being given to two patients before escalating the dose, and with at least a  
27 week between pairs of recruits. In the subsequent adaptive phase the data will be  
28 analysed sequentially after each subject is observed by fitting a candidate set of  
29 statistical models to the dose-response curve. Each model will provide an estimate  
30 and standard error (SE) of the doses that achieve the two targets of a minimum  
31 Treg increase and a therapeutic Treg increase. Each model will also provide a  
32 recommended dose to assign to the next patient. The choice of doses will be  
33 approved by a Dose Determining Committee (DDC) in the light of the reports and  
34 recommendations provided. The maximum dose of IL-2 that can be assigned is  $1.5$   
35  $\times 10^6$  IU/m<sup>2</sup>. The study has been approved by Health Research Authority, National  
36 Regulatory Ethics Service (13/EE/0020).  
37  
38  
39  
40

### 41 **Dose Determining Committee**

42  
43 The scope of the DDC is to review the interim analysis after the first ten trial  
44 participants and then provide decisions regarding the choice of dose to administer to  
45 subsequent participants. The DDC also reviews all safety data accumulated in the  
46 trial at each meeting. The DDC is comprised of a statistician, physician and scientist  
47 drawn from the members of the Trial Management Committee or named in the trial  
48 delegation log. More than one member from each role (statistician, physician and  
49 scientist) can attend the meeting but each role is only allowed a single vote at the  
50 DDC meeting. A statistician, a clinician, and a scientist are required to attend to  
51 reach a quorate. Decisions at the DDC meeting can be reached by a majority vote.  
52 The Trial Steering Committee can be called upon by the Chair to review any  
53 decisions that cannot be agreed upon if requested to by other member(s) of the  
54 DDC. Given the safety role of the DDC, the Chair is the Chief Investigator or if  
55 unavailable, the Chief Investigator may delegate the chair to another physician.  
56  
57  
58  
59  
60

1  
2  
3 After the tenth participant has completed seven days of follow up after  
4 administration of the drug, data will be extracted from the trial database and  
5 analyzed. The interim analysis will be performed by the members of the Trial  
6 Management Committee and will be delivered to the DDC within ten working days of  
7 this date for review. Following the interim analysis, data will be extracted from the  
8 trial database after each patient has completed seven days of follow-up. A report  
9 generated from the data will be delivered to the DDC within one to two working days  
10 of this date, the tight timelines enabling the next dose to be prescribed for a patient  
11 treated at the start of the following week.  
12  
13

14 The report generated from the data by the trial statistician for the DDC to review will  
15 include: plots of all the patient profiles (Treg response versus time); plots of the  
16 sequence of doses; a scatter plot of the primary endpoint (maximal percentage  
17 change of Treg, log-transformed) versus dose; the same scatter plot of the primary  
18 endpoint versus dose with superimposed fitted models with 95% confidence bands  
19 for a list of statistical models; estimated target doses and confidence intervals;  
20 residual plots of each model fitted; raw output from statistical packages to double-  
21 check on convergence; and finally a choice of dose decisions for future patients. The  
22 statistical models will initially include: Linear, Quadratic, Cubic, Emax, Emax4 (four  
23 parameter) and Logistic (four parameter).  
24  
25  
26

### 27 **Study participants and recruitment**

28  
29 Potential participants will need to provide written informed consent before  
30 undergoing any trial related procedures, including screening. Eligible Participants will  
31 have a history of T1D with a duration of diabetes less than 24 months from  
32 diagnosis and be positive for at least one autoantibody (Box 1). Participants will be  
33 excluded if they have a history or evidence of severe organ dysfunction, unstable  
34 type 1 diabetes, pregnancy, malignancy, active autoimmune thyroid disease, active  
35 clinical infection, hepatitis B or C, HIV and/or organ transplantation (Box 2).  
36  
37

38 Potential participants can be informed of the study by several different systems  
39 depending on geographical location and participant preference. For local recruitment  
40 potential participants will be identified by their treating physicians, diabetes nurses  
41 and research nurses at Addenbrooke's hospital or approved patient information  
42 sites. The contact details of identified potential participants, with their agreement,  
43 will be passed to the study team. For national recruitment participants who have  
44 registered with the ADDRESS-2 register [24] or the D-GAP study [25] will be  
45 contacted to determine if they are interested in enrolling in the study. Details of the  
46 study will also be provided to patient groups and charities and will be posted on  
47 [www.clinical-trials-type1-diabetes.com](http://www.clinical-trials-type1-diabetes.com). There will also be a Facebook page and  
48 twitter feed for this study.  
49  
50

### 51 **The DILT1D study outcome measures**

52  
53 The primary endpoint is based upon the percentage of CD4<sup>+</sup> T regulatory (defined as  
54 CD3<sup>+</sup>CD4<sup>+</sup>CD25<sup>high</sup>CD127<sup>low</sup>) cells within the CD3<sup>+</sup> CD4<sup>+</sup> T cell gate following  
55 treatment with IL-2 as measured by Fluorescence activated cell sorting (FACS). The  
56 maximum value observed in each patient's profile over the first seven days of the  
57  
58  
59  
60



1  
2  
3 follow-up period will be identified and the percentage change from the baseline  
4 value defines the primary endpoint.  
5

6 The following secondary outcomes will be measured following IL-2 treatment:  
7

- 8 • Change in T regulatory cell number, phenotype and proliferation will be  
9 measured by FACS.
- 10 • Change in T regulatory cell epigenetic profile.
- 11 • Change in T effector cell number, proliferation and phenotype will be  
12 measured by FACS.
- 13 • Change in lymphocyte cell number, proliferation and phenotype subsets and  
14 NK and NKT cells will be measured by FACS and full blood count.
- 15 • Change in cytokines and soluble receptors
- 16 • Change in metabolic control as measured by self-monitoring of blood glucose  
17 (SMBG), laboratory measurement of blood glucose and HbA1c and C-peptide.  
18  
19

20  
21 The following exploratory endpoints will be measured:  
22

- 23 • Change in intracellular T and NK cell signaling will be measured ex vivo by  
24 FACS following IL-2 treatment. An in vitro dose response to IL-2 will also be  
25 performed to assess durable changes in intracellular T cell signaling.  
26
- 27 • Change in Treg function will be measured by T cell suppression assay.  
28
- 29 • Change in T cell, NK and peripheral blood mononuclear cell gene expression.  
30
- 31 • Subjects will be characterized for genotypes at type 1 diabetes susceptibility  
32 genes related to the IL-2 pathway.  
33  
34  
35  
36

### 37 Safety assessments

38 Safety and tolerability assessments will include clinical history, insulin use, physical  
39 examination, temperature, blood pressure, heart rate, 12-Lead electrocardiogram  
40 (ECGs), glucose, HbA1c, clinical laboratory tests and adverse event recording.  
41  
42

### 43 **Fluorescence activated cell sorting measurements and mechanistic analysis**

44 The FACS for T regulatory cell (CD3, CD4, CD25, CD127) counts and proportions  
45 (%) that define the primary endpoint will be performed at the Department of  
46 Immunology, Addenbrooke's Hospital, Cambridge, a clinical laboratory that has been  
47 approved for good clinical practice (GCP). This assay will be carried out in a blinded  
48 fashion without the operators knowing the dose allocation for participants. The non  
49 clinical mechanistic analysis for the secondary and exploratory endpoints for FACS  
50 immunophenotyping, Treg epigenetics, intracellular T and NK cell signaling, T cell  
51 function genotype, gene expression analysis will be performed at the JDRF/Wellcome  
52 Trust Diabetes and Inflammation Laboratory (DIL), Cambridge Institute of Medical  
53 Research, University of Cambridge, Cambridge.  
54  
55  
56  
57  
58  
59  
60

## Statistical methods

As an exploratory dose-finding study a formal sample size calculation is not appropriate. Simulation work shows that a sample size of 40 patients will give informative estimates of the target doses, assuming the underlying dose-response relationship can achieve the target responses within a safe range of doses and the between-patient variability does not dominate the dose-response relationship too much to be of practical clinical use.

A dose-response curve describing the relationship between the primary endpoint and the dose will be fitted for a selection of parametric models. Estimates and standard errors for all parameters, including the inter-patient variability, will be provided for all models, as well as an assessment of the goodness-of-fit for each model[26]. An estimate, standard error, and 95% confidence intervals will be produced for the doses associated with each of the different modelling assumptions that achieve the target response rates

The target response rates are those that achieve a:

1. Minimal Treg increase
2. Maximal Treg increase

However the numerical values that define these increases will only be defined in the light of the data provided by the initial ten subjects. After analysis by the DDC and following review by the TSC) these targets will be fixed for the course of the trial.

Summary statistics of all endpoints measured at baseline will be produced. Continuous variables will report sample size, mean, standard deviation, median, minimum and maximum. Categorical or binary variables will report sample size, counts, and percentages.

All secondary and exploratory endpoints measured after treatment will be explored using graphical methods, such as scatter plots, to examine their relationship to dose and other explanatory endpoints measured at baseline. A regression framework will be used to quantify such relationships, allowing for adjustments for baseline covariates and time-point; transformations of the response variable will be made where appropriate, and allowances for correlations within subjects and/or within related endpoints will be made.

## Discussion

Previous clinical trials involving the treatment of patients with newly diagnosed T1D with potential immunotherapeutics have embarked on large proof of concept trials without first establishing the correct dose of the experimental agent in order to achieve the desired immunological outcome. Doses have been usually derived from experience of an agent in another disease entity such as in the case of teplizumab (non-Fc-binding anti-CD3) where the dose used in T1D is the same as that used in renal transplantation (OKT3)[27]. Similarly, the doses of rituximab (anti-CD20) and abatacept (CTLA-4Ig) when used to treat T1D have been derived from clinical experience in rheumatoid arthritis[28-31]. In the case of otelexizumab (non-FcR-binding anti-CD3), experience from murine models was combined with limited human data to arrive at a dose. This has led, despite considerable efforts, to suboptimal outcomes in clinical trials of these agents; and in the case of otelexizumab, a complete failure due to a lack of therapeutic effect in humans[32].

It is clear that new strategies need to be developed to rapidly determine the mechanisms of action of immunotherapeutic agents in patients with type 1 diabetes prior to embarking on large phase II/III clinical trials.

The main goals of this adaptive mechanistic trial are: To establish the best doses of IL-2 to administer in patients with T1D in order to:

- a. induce a minimal Treg increase
- b. induce a maximal Treg increase

Secondary goals are:

1. To determine the duration of Treg response from a single dose of IL-2
2. To investigate the utility of biomarkers of IL-2 responsiveness in treated individuals

Administration of a single ultra low dose of IL-2 to patients with T1D will enable the determination of the response of the Treg population in this disease. By monitoring the Treg population over subsequent days and weeks we can determine the duration of the Treg population increase in frequency and function and the return to baseline. It is essential that the optimal dose and duration of response of Tregs be established in T1D prior to the initiation of any future trials of IL-2. Both the dose and the frequency of dosing will determine if aldesleukin is clinically acceptable for the long term treatment of T1D. An empirically derived dose based on experience in other diseases may not be beneficial in T1D since both the treatment protocols used in GVHD and HCV vasculitis gave a large rise in Treg population (8 and 4 fold rise in Tregs from baseline, respectively) and alterations of Treg frequency is not a feature of T1D. Our aim in T1D will be cause a small or physiological (0-0.25 fold) and sustained increase in Treg frequency and function that may be maintained over the long term to induce tolerance to insulin-producing pancreatic beta cells. This trial will provide the opportunity to determine the minimum dose of IL-2 that could be used to initiate treatment of patients with newly diagnosed T1D, and, in the future, to test

1  
2  
3 the possibility that ULD IL-2 can prevent the onset of autoimmunity, which occurs  
4 many years before disease diagnosis. In addition, it will provide data regarding the  
5 duration of Treg response which can be used to estimate the frequency of IL-2  
6 dosing in future trials.  
7

8  
9 An adaptive trial design is well suited to determine the dose response of Tregs to IL-  
10 2 therapy. Tregs are an appropriate biomarker since they are highly responsive to  
11 IL-2 therapy in humans at ULD and defects in their function are key to the  
12 development of T1D. By use of an adaptive design, following the learning phase of  
13 the trial where the first ten start-up patients receive pre-specified doses, Treg data  
14 from each subject treated can be used to inform the IL-2 dose administered to  
15 subsequent individuals in the trial thereby more efficiently accessing the dose  
16 outcome relationship. In this manner Treg data from all patients enrolled will be  
17 used. Compared to a standard dosing trial an adaptive design has the advantage of  
18 not having to make definitive decisions prior to trial regarding dose and allocation to  
19 pre designated treatment groups.  
20  
21

22 By targeting the IL-2 pathway, one of the key aetiological pathways causing  
23 susceptibility to T1D, it will be possible to examine if IL-2 therapy rectifies known  
24 deficiencies by analysis of associated biomarkers. Individual subjects will have their  
25 T cell subsets followed longitudinally and characterised by deep immunophenotyping  
26 before and after treatment to determine the effects on CD25 and FOXP3 expression.  
27 Monitoring for increased proliferation (Ki-67) and the emergence of recent thymic  
28 emigrants (CD31<sup>+</sup> cells, increased T cell receptor excision circles) will be performed.  
29 The stability of Tregs will be determined by phenotype (FOXP3, CTLA-4) and by  
30 epigenetic analysis of the regulatory regions of FOXP3 and genes associated with  
31 Treg function. Measurement of intracellular pSTAT5 signaling in lymphocytes will  
32 establish if qualitative defects in IL-2 signaling in T1D are corrected by therapy.  
33 Analysis of this panel of biomarkers may determine if individual or combinations of  
34 assays may be useful in future trials to stratify T1D patients on their ability to  
35 respond to IL-2 treatment.  
36  
37  
38  
39  
40  
41

## 42 **Acknowledgments**

43 The authors acknowledge the assistance and support of the Cambridge Clinical Trial  
44 Unit for trial co-ordination. The NIHR Wellcome Trust Clinical Research Facility for  
45 clinical facilities. Sarah Nutland and Simon Hacking at the Cambridge BioResource  
46 for assistance will study set up and publicity. Helen Stevens, Vin Everett and  
47 Sundeep Nanuwa for logistical and web development at JDRF/Wellcome Trust  
48 Diabetes and Inflammation Laboratory, Cambridge Institute for Medical Research.  
49 The generous participation and contributions of the volunteers in the study are very  
50 gratefully acknowledged  
51  
52

## 53 **Competing interests**

54  
55  
56 FWL has received fees for consulting on type 1 diabetes from GlaxoSmithKline and  
57 funds to support research from F Hoffmann-La Roche.  
58  
59  
60

## Funding

This work was funded by the JDRF (9-2011-253), the Wellcome Trust (091157) and the National Institute for Health Research (NIHR) Cambridge Biomedical Research Centre. The research leading to these results has received funding from the European Union's 7th Framework Programme (FP7/2007-2013) under grant agreement no. 241447 (NAIMIT). The Cambridge Institute for Medical Research (CIMR) is in receipt of a Wellcome Trust Strategic Award (100140).

## Contributors

FWL is the chief investigator of the study, led protocol development, REC submission and presentation, design of study governance and wrote the manuscript. PK, KI and MW contributed to protocol development and coordinated REC application. SB and AW developed the statistical design for the study and wrote the statistical sections of the protocol. LW, JT and FWL had the original idea for the study and coordinated the assay development for the study. All authors reviewed the protocol.

## References

1. Patterson CC, Dahlquist GG, Gyurus E, et al. Incidence trends for childhood type 1 diabetes in Europe during 1989-2003 and predicted new cases 2005-20: a multicentre prospective registration study. *Lancet* 2009;**373**(9680):2027-33 doi: S0140-6736(09)60568-7 [pii] 10.1016/S0140-6736(09)60568-7 [doi][published Online First: Epub Date]].
2. Daneman D. Type 1 diabetes. *Lancet* 2006;**367**(9513):847-58 doi: S0140-6736(06)68341-4 [pii] 10.1016/S0140-6736(06)68341-4 [doi][published Online First: Epub Date]].
3. Group DCaCTR. The effect of intensive treatment of diabetes on the development and progression of long-term complications in insulin-dependent diabetes mellitus. The Diabetes Control and Complications Trial Research Group. *N Engl J Med* 1993;**329**(14):977-86
4. Group DCaCTR. Hypoglycemia in the Diabetes Control and Complications Trial. *Diabetes* 1997;**46**(2):271-86
5. Steffes MW, Sibley S, Jackson M, et al. Beta-cell function and the development of diabetes-related complications in the diabetes control and complications trial. *Diabetes Care* 2003;**26**(3):832-6
6. Todd JA. Etiology of type 1 diabetes. *Immunity* 2010;**32**(4):457-67 doi: S1074-7613(10)00126-3 [pii]10.1016/j.immuni.2010.04.001[published Online First: Epub Date]].
7. Todd JA, Walker NM, Cooper JD, et al. Robust associations of four new chromosome regions from genome-wide analyses of type 1 diabetes. *Nat Genet* 2007;**39**(7):857-64 doi: ng2068 [pii]10.1038/ng2068[published Online First: Epub Date]].
8. Dendrou CA, Plagnol V, Fung E, et al. Cell-specific protein phenotypes for the autoimmune locus IL2RA using a genotype-selectable human bioresource. *Nat Genet* 2009;**41**(9):1011-5 doi: ng.434 [pii] 10.1038/ng.434[published Online First: Epub Date]].
9. Yamanouchi J, Rainbow D, Serra P, et al. Interleukin-2 gene variation impairs regulatory T cell function and causes autoimmunity. *Nat Genet* 2007;**39**(3):329-37 doi: ng1958 [pii]10.1038/ng1958[published Online First: Epub Date]].

10. Delgoffe GM, Kole TP, Zheng Y, et al. The mTOR kinase differentially regulates effector and regulatory T cell lineage commitment. *Immunity* 2009;30(6):832-44 doi: S1074-7613(09)00237-4 [pii]10.1016/j.immuni.2009.04.014[published Online First: Epub Date]].
11. Burchill MA, Yang J, Vogtenhuber C, et al. IL-2 receptor beta-dependent STAT5 activation is required for the development of Foxp3+ regulatory T cells. *J Immunol* 2007;178(1):280-90 doi: 178/1/280 [pii][published Online First: Epub Date]].
12. Dendrou CA, Wicker LS. The IL-2/CD25 pathway determines susceptibility to T1D in humans and NOD mice. *J Clin Immunol* 2008;28(6):685-96 doi: 10.1007/s10875-008-9237-9[published Online First: Epub Date]].
13. Doyle MV, Lee MT, Fong S. Comparison of the biological activities of human recombinant interleukin-2(125) and native interleukin-2. *J Biol Response Mod* 1985;4(1):96-109
14. Fyfe G, Fisher RI, Rosenberg SA, et al. Results of treatment of 255 patients with metastatic renal cell carcinoma who received high-dose recombinant interleukin-2 therapy. *J Clin Oncol* 1995;13(3):688-96
15. Rosenberg SA, Yang JC, White DE, et al. Durability of complete responses in patients with metastatic cancer treated with high-dose interleukin-2: identification of the antigens mediating response. *Ann Surg* 1998;228(3):307-19
16. Negrier S, Escudier B, Lasset C, et al. Recombinant human interleukin-2, recombinant human interferon alfa-2a, or both in metastatic renal-cell carcinoma. *Groupe Français d'Immunothérapie. N Engl J Med* 1998;338(18):1272-8 doi: 10.1056/NEJM199804303381805[published Online First: Epub Date]].
17. Yang JC, Sherry RM, Steinberg SM, et al. Randomized study of high-dose and low-dose interleukin-2 in patients with metastatic renal cancer. *J Clin Oncol* 2003;21(16):3127-32 doi: JCO.2003.02.122 [pii]10.1200/JCO.2003.02.122[published Online First: Epub Date]].
18. Abrams D, Lévy Y, Losso MH, et al. Interleukin-2 therapy in patients with HIV infection. *N Engl J Med* 2009;361(16):1548-59 doi: 361/16/1548 [pii]10.1056/NEJMoa0903175[published Online First: Epub Date]].
19. Rabinovitch A, Suarez-Pinzon WL, Shapiro AM, et al. Combination therapy with sirolimus and interleukin-2 prevents spontaneous and recurrent autoimmune diabetes in NOD mice. *Diabetes* 2002;51(3):638-45
20. Turnquist HR, Raimondi G, Zahorchak AF, et al. Rapamycin-conditioned dendritic cells are poor stimulators of allogeneic CD4+ T cells, but enrich for antigen-specific Foxp3+ T regulatory cells and promote organ transplant tolerance. *J Immunol* 2007;178(11):7018-31 doi: 178/11/7018 [pii][published Online First: Epub Date]].
21. Long SA, Rieck M, Sanda S, et al. Rapamycin/IL-2 Combination Therapy in Patients with Type 1 Diabetes Augments Tregs yet Transiently Impairs  $\beta$ -Cell Function. *Diabetes* 2012 doi: db12-0049 [pii]10.2337/db12-0049[published Online First: Epub Date]].
22. Koreth J, Matsuoka K, Kim HT, et al. Interleukin-2 and regulatory T cells in graft-versus-host disease. *N Engl J Med* 2011;365(22):2055-66 doi: 10.1056/NEJMoa1108188[published Online First: Epub Date]].
23. Saadoun D, Rosenzweig M, Joly F, et al. Regulatory T-cell responses to low-dose interleukin-2 in HCV-induced vasculitis. *N Engl J Med* 2011;365(22):2067-77 doi: 10.1056/NEJMoa1105143[published Online First: Epub Date]].
24. ADDRESS2. After Diabetes Diagnosis REsearch Support System (ADDRESS). <http://wwwaddress2.org> 2014
25. DGAP. Diabetes: Genes, auto-immunity and prevention. <http://paediatricmedschlcamacuk/research/clinical-trials/d-gap-diabetes-genes-auto-immunity-and-prevention/> 2014
26. Dette H, Bornkamp B, Bretz F. On the efficiency of two-stage response-adaptive designs. *Stat Med* 2012;32(10):1646-60 doi: 10.1002/sim.5555[published Online First: Epub Date]].

- 1  
2  
3 27. Group OMTS. A randomized clinical trial of OKT3 monoclonal antibody for acute rejection of  
4 cadaveric renal transplants. *N Engl J Med* 1985;313(6):337-42 doi:  
5 10.1056/nejm198508083130601[published Online First: Epub Date]].  
6  
7 28. Pescovitz MD, Greenbaum CJ, Krause-Steinrauf H, et al. Rituximab, B-lymphocyte depletion, and  
8 preservation of beta-cell function. *N Engl J Med* 2009;361(22):2143-52 doi: 361/22/2143 [pii]  
9 10.1056/NEJMoa0904452[published Online First: Epub Date]].  
10  
11 29. Kremer JM, Dougados M, Emery P, et al. Treatment of rheumatoid arthritis with the selective  
12 costimulation modulator abatacept: twelve-month results of a phase iib, double-blind,  
13 randomized, placebo-controlled trial. *Arthritis Rheum* 2005;52(8):2263-71 doi:  
14 10.1002/art.21201 [doi][published Online First: Epub Date]].  
15  
16 30. Orban T, Bundy B, Becker DJ, et al. Co-stimulation modulation with abatacept in patients with  
17 recent-onset type 1 diabetes: a randomised, double-blind, placebo-controlled trial. *Lancet*  
18 2011;378(9789):412-9 doi: S0140-6736(11)60886-6 [pii] 10.1016/S0140-6736(11)60886-  
19 6[published Online First: Epub Date]].  
20  
21 31. Edwards JC, Szczepanski L, Szechinski J, et al. Efficacy of B-cell-targeted therapy with rituximab in  
22 patients with rheumatoid arthritis. *N Engl J Med* 2004;350(25):2572-81 doi: 350/25/2572  
23 [pii]10.1056/NEJMoa032534[published Online First: Epub Date]].  
24  
25 32. Defend-1. Trial of Otelixizumab for Adults With Newly Diagnosed Type 1 Diabetes Mellitus  
26 (Autoimmune): DEFEND-1. <http://clinicaltrials.gov/ct2/show/NCT00678886> 2010

### Box 1 Inclusion Criteria

27 Type 1 diabetes  
28 18-50 years of age  
29 Duration of diabetes less than 24 months from diagnosis  
30 At least one positive autoantibody (anti-islet cell, anti-GAD, anti-  
31 IA2, anti-ZnT8)  
32 Written informed consent  
33

### Box 2 Exclusion Criteria

34  
35  
36 Hypersensitivity to aldesleukin or any of the excipients  
37 History of severe cardiac disease  
38 History of malignancy within the past 5 years (with the exception of  
39 localized carcinoma of the skin that had been resected for cure or  
40 cervical carcinoma *in situ*)  
41 History or concurrent use of immunosuppressive agents or  
42 steroids.  
43 History of unstable diabetes with recurrent hypoglycaemia  
44 Active autoimmune hyper or hypothyroidism  
45 Active clinical infection  
46 Major pre-existing organ dysfunction or previous organ allograft  
47 Females who are pregnant, lactating or intend to get pregnant during the  
48 study  
49 Males who intend to father a pregnancy during the study  
50 Donation of more than 500 ml of blood within 2 months prior to  
51 aldesleukin administration  
52 Participation in a previous therapeutic clinical trial within 2 months prior to  
53 aldesleukin administration  
54 Abnormal ECG  
55 Abnormal full blood count, chronic renal failure (Stage 3,4,5) and/or  
56 evidence impaired liver function  
57  
58  
59  
60

1  
2  
3 Positive HBsAg or HepC serology or HIV test  
4 Any medical history or clinically relevant abnormality that is deemed by the  
5 principal investigator and/or medical monitor to make the patient ineligible  
6 for inclusion because of a safety concern  
7

8 **Figure 1.** Study design for adaptive phase of DILT1D. The primary endpoint of the  
9 study is the maximum percentage increase in Tregs from baseline over the first 7  
10 days following treatment with ULD IL-2. The T regulatory data from all participants  
11 treated is then used to inform the IL-2 dose administered to subsequent participants  
12 thereby more efficiently accessing the dose outcome relationship.  
13  
14  
15  
16  
17  
18  
19  
20  
21  
22  
23  
24  
25  
26  
27  
28  
29  
30  
31  
32  
33  
34  
35  
36  
37  
38  
39  
40  
41  
42  
43  
44  
45  
46  
47  
48  
49  
50  
51  
52  
53  
54  
55  
56  
57  
58  
59  
60



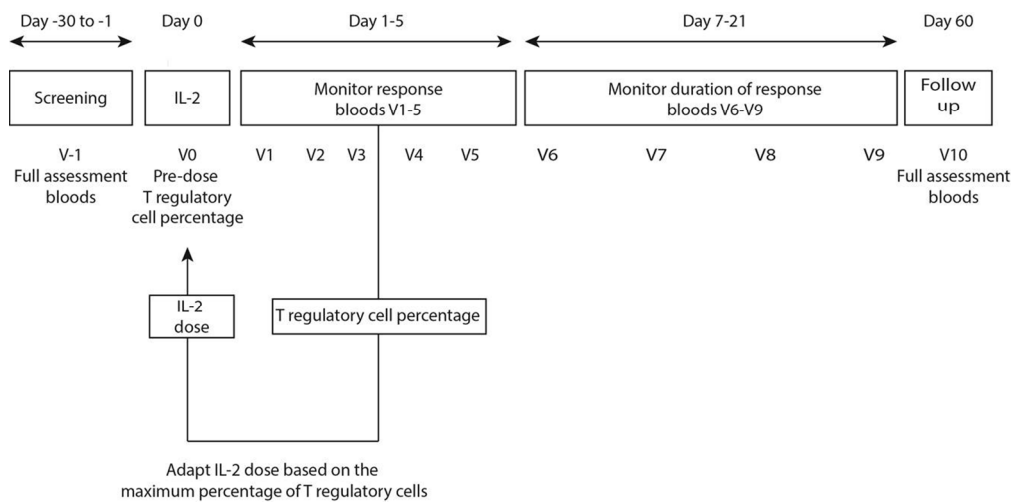

Figure 1. Study design for adaptive phase of DILT1D. The primary endpoint of the study is the maximum percentage increase in Tregs from baseline over the first 7 days following treatment with ULD IL-2. The T regulatory data from all participants treated is then used to inform the IL-2 dose administered to subsequent participants thereby more efficiently accessing the dose outcome relationship  
224x110mm (150 x 150 DPI)

review only

# BMJ Open

## Rationale and study design of the Adaptive study of IL-2 dose on regulatory T cells in type 1 diabetes (DILT1D): a non randomised, open label, adaptive dose finding trial.

|                                 |                                                                                                                                                                                                                                                                                                                                                                                                                                                                                                                                                                                                                                                                                                                                                                                                                                                                                                                                                                       |
|---------------------------------|-----------------------------------------------------------------------------------------------------------------------------------------------------------------------------------------------------------------------------------------------------------------------------------------------------------------------------------------------------------------------------------------------------------------------------------------------------------------------------------------------------------------------------------------------------------------------------------------------------------------------------------------------------------------------------------------------------------------------------------------------------------------------------------------------------------------------------------------------------------------------------------------------------------------------------------------------------------------------|
| Journal:                        | <i>BMJ Open</i>                                                                                                                                                                                                                                                                                                                                                                                                                                                                                                                                                                                                                                                                                                                                                                                                                                                                                                                                                       |
| Manuscript ID:                  | bmjopen-2014-005559.R1                                                                                                                                                                                                                                                                                                                                                                                                                                                                                                                                                                                                                                                                                                                                                                                                                                                                                                                                                |
| Article Type:                   | Protocol                                                                                                                                                                                                                                                                                                                                                                                                                                                                                                                                                                                                                                                                                                                                                                                                                                                                                                                                                              |
| Date Submitted by the Author:   | 03-May-2014                                                                                                                                                                                                                                                                                                                                                                                                                                                                                                                                                                                                                                                                                                                                                                                                                                                                                                                                                           |
| Complete List of Authors:       | Waldron-Lynch, Frank; University of Cambridge, JDRF/Wellcome Trust Diabetes & Inflammation Laboratory, Cambridge Institute for Medical Research<br>Kareclas, Paula; Cambridge University Hospitals NHS Foundation Trust, Cambridge Clinical Trials Unit<br>Irons, Kathryn; Cambridge University Hospitals NHS Foundation Trust, Cambridge Clinical Trials Unit<br>Walker, Neil; University of Cambridge, JDRF/Wellcome Trust Diabetes & Inflammation Laboratory Cambridge Institute for Medical Research<br>Mander, Adrian; Institute of Public Health, MRC Biostatistics Unit<br>Wicker, Linda; University of Cambridge, JDRF/Wellcome Trust Diabetes & Inflammation Laboratory Cambridge Institute for Medical Research<br>Todd, John; University of Cambridge, JDRF/Wellcome Trust Diabetes & Inflammation Laboratory Cambridge Institute for Medical Research<br>Bond, Simon; Cambridge University Hospitals NHS Foundation Trust, Cambridge Clinical Trials Unit |
| <b>Primary Subject Heading</b>: | Diabetes and endocrinology                                                                                                                                                                                                                                                                                                                                                                                                                                                                                                                                                                                                                                                                                                                                                                                                                                                                                                                                            |
| Secondary Subject Heading:      | Immunology (including allergy), Pharmacology and therapeutics                                                                                                                                                                                                                                                                                                                                                                                                                                                                                                                                                                                                                                                                                                                                                                                                                                                                                                         |
| Keywords:                       | Immunology < BASIC SCIENCES, Clinical trials < THERAPEUTICS, General diabetes < DIABETES & ENDOCRINOLOGY                                                                                                                                                                                                                                                                                                                                                                                                                                                                                                                                                                                                                                                                                                                                                                                                                                                              |
|                                 |                                                                                                                                                                                                                                                                                                                                                                                                                                                                                                                                                                                                                                                                                                                                                                                                                                                                                                                                                                       |

SCHOLARONE™  
Manuscripts

**Title**

Rationale and study design of the Adaptive study of **IL**-2 dose on regulatory T cells in type **1** diabetes (DILT1D): a non randomised, open label, adaptive dose finding trial.

Frank Waldron-Lynch<sup>1\*</sup>, Paula Kareclas<sup>2</sup>, Kathryn Irons<sup>2</sup>, Neil Walker<sup>1</sup>, Adrian Mander<sup>3</sup>, Linda Wicker<sup>1</sup>, John Todd<sup>1</sup>, Simon Bond<sup>2</sup>.

<sup>1</sup>JDRF/Wellcome Trust Diabetes & Inflammation Laboratory, Cambridge Institute for Medical Research, University of Cambridge, Addenbrooke's Hospital, Hills Road, Cambridge CB2 0XY, United Kingdom.

<sup>2</sup>Cambridge Clinical Trials Unit, Cambridge University Hospitals NHS Foundation Trust, Addenbrooke's Hospital, Hills Road, Cambridge, CB2 0QQ, United Kingdom.

<sup>3</sup>MRC Biostatistics Unit, Cambridge Institute of Public Health, Forvie Site, Robinson Way, Cambridge CB2 0SR, United Kingdom.

**\*Corresponding author**

Dr Frank Waldron-Lynch,

JDRF/Wellcome Trust Diabetes & Inflammation Laboratory, Cambridge Institute for Medical Research, University of Cambridge, Addenbrooke's Hospital, Hills Road, Cambridge CB2 0XY, United Kingdom.

Email: [frank.waldron-lynch@cimr.cam.ac.uk](mailto:frank.waldron-lynch@cimr.cam.ac.uk).

Telephone: +447872410617

Fax: +441223762102

**Keywords**

Type 1 diabetes, Interleukin-2, Clinical trials, Regulatory T cells, Immunomodulation

**Word count**

3396

## Abstract

**Introduction:** CD4+ T regulatory cells(Tregs) are crucial for the maintenance of self-tolerance and are deficient in many common autoimmune diseases such as type 1 diabetes(T1D). Interleukin-2(IL-2) plays a major role in the activation and function of Tregs and treatment with ultra low dose(ULD) IL-2 could increase Treg function to potentially halt disease progression in T1D. However prior to embarking on large phase II/III clinical trials it is critical to develop new strategies for determining the mechanism of action of ULD IL-2 in participants with T1D. In this mechanistic study we will combine a novel trial design with a clinical grade Treg assay to identify the best doses of ULD IL-2 to induce targeted increases in Tregs.

**Method and analysis:** DILT1D is a single centre non-randomised, single dose, open label, adaptive dose finding trial. The primary objective of DILT1D is to identify the best doses of IL-2 to achieve a minimal or maximal Treg increase in participants with T1D (N=40). The design has an initial learning phase where pairs of patients are assigned to five pre-assigned doses followed by an interim analysis to determine the two Treg targets for the remainder of the trial. This will then be followed by an adaptive phase which is fully sequential with an interim analysis after each patient to determine the choice of dose based on the optimality criterion to minimise the determinant of the covariance of the estimated target doses. A Dose Determining Committee (DDC) will review all data available at the interim(s) and then provide decisions regarding the choice of dose to administer to subsequent participants.

**Ethics and dissemination:** Ethical approval for the study was granted 18th February 2013. Results of this study will be reported through peer reviewed journals, conference presentations and an internal organisational report.

**Trial registration numbers** NCT01827735, ISRCTN27852285, DRN767

## Strengths and limitations of this study

This is an adaptive dose finding trial that combines a new trial design with the use of immunological biomarkers to develop a new treatment for type 1 diabetes.

The study incorporates detailed experimental medicine mechanistic studies that will investigate the actions of ultra low dose IL-2 on the human immune system.

The adaptive study design has required the development of new trial governance structures to allow data generated in the study to be rapidly analysed and utilised to inform dosing decisions.

The study does not aim to determine the metabolic effects of treatment.

## Introduction

Type 1 diabetes (T1D) is the most common severe chronic autoimmune disease worldwide. The incidence of type 1 diabetes is rising rapidly with a predicted increase in paediatric cases of 70% over the next 15 years in Europe[1]. The aetiology of type 1 diabetes is the autoimmune (loss of self tolerance) mediated destruction of the insulin producing pancreatic beta cells leading to insulin deficiency and development of hyperglycaemia[2]. At present, medical management of T1D focuses on intensive insulin replacement therapy to limit microvascular complications (retinopathy, nephropathy, neuropathy). Despite incremental improvement over the last 90 years clinical outcomes remain suboptimal with fewer than 5% of patients in the intensively treated group of the pivotal Diabetes Control and Complications Trial achieving glycaemic targets[3]. The limiting factor for achieving euglycemia was hypoglycaemia as a result of exogenous insulin treatment. That is the tighter the glycaemic control the greater the frequency of hypoglycaemia[4]. However, patients who had residual endogenous insulin function had a reduced level of microvascular complications and hypoglycaemia, which was most likely due to the preservation of the counter regulator responses to low blood sugars[5]. These findings have led intensive efforts to arrest the autoimmune process by novel immunotherapy and thereby preserve residual insulin production leading to improved clinical outcomes in type 1 diabetes.

Genome wide association studies have found that most genes contributing to T1D susceptibility encode proteins involved in immune regulation and immune function[6]. In particular, several of the proteins are part of the interleukin 2 (IL-2) pathway that regulates T cell activation and tolerance to self antigens: IL-2, CD25, the alpha chain of the IL-2 receptor (*IL2RA*), BACH2 and protein tyrosine phosphatase non-receptor type 2 (PTPN2)[7]. Phenotypic characterisation of CD25 expression on CD4 T cell subsets has demonstrated that individuals carrying susceptibility alleles at *IL2RA* have memory CD4 T cells with reduced CD25 expression and less production of IL-2 upon activation[8]. Physiologically, IL-2 expression and signalling via the high affinity trimeric IL-2 receptor is essential for the maintenance of self tolerance and the prevention of autoimmunity[9].

Treg and T effector (Teff) cells differ in their abilities to respond to IL-2 due to their distinct CD25 levels and the balance of their intracellular signalling molecules. In response to IL-2, Tregs intracellularly signal primarily via the pSTAT5 pathway while Teffs also activate the MAPK and PI3K/AKT pathways[10 11]. Importantly, Tregs have a greater sensitivity to IL-2 due to their higher expression of the high affinity IL-2 receptor compared to Teff cells. Natural killer (NK) cells also require higher concentrations of IL-2 to be activated since this subset primarily expresses the intermediate affinity IL-2 receptor that is composed of dimers of the beta and gamma chains[12]. The higher sensitivity of Tregs for IL-2 opens a therapeutic window where ultra low doses of IL-2 therapy can be used to enhance Treg responses in patients with T1D.

Aldesleukin or Proleukin is a human recombinant IL-2 product produced by recombinant DNA technology using a genetically engineered *E. coli* strain expressing an analogue of the human IL-2 gene. The *in vitro* biological activities of the native non-recombinant compound have been reproduced with aldesleukin[13]. Aldesleukin is produced by Prometheus Laboratories on behalf of Novartis Vaccine and Diagnostics.

1  
2  
3 High dose aldesleukin is currently indicated for the treatment of adults with  
4 metastatic renal cell cancer (RCC)[14] and metastatic melanoma skin cancer[15].  
5 Initial clinical trials in metastatic RCC administered intravenously  $18 \times 10^6$  IU of  
6 aldesleukin every 8 hours for a maximum of 14 days. Following 9 days of rest a  
7 further 14 doses were administered. Less than 10% of patients had a complete  
8 response to IL-2 therapy[16]. Alternative regimens with subcutaneous aldesleukin  
9 have also been used. Aldesleukin is administered at  $18 \times 10^6$  IU every day for 5  
10 days, followed by 2 days of rest. For the following 3 weeks  $18 \times 10^6$  IU is  
11 administered on days 1 and 2 of each week followed by  $9 \times 10^6$  IU on days 3-5. On  
12 days 6 and 7 no drug is administered. After 1 week rest this 4 week cycle is  
13 repeated[16]. The reduced dose regimens, though minimising side effects, yield  
14 substantially lower clinical responses than the high dose protocol and are not  
15 considered effective treatment of metastatic renal cell carcinoma[17].  
16

17  
18 In patients with HIV, clinical trials of aldesleukin therapy have been conducted to  
19 determine if increasing the CD4<sup>+</sup> T cell count would improve clinical outcomes  
20 (opportunistic disease or death from any cause). The Subcutaneous Recombinant  
21 Interleukin-2 in HIV Patients with Low CD4<sup>+</sup> Counts under Active Antiretroviral  
22 Therapy (SILCAAT) trial administered a dose of  $4.5 \times 10^6$  IU twice daily for 5 days  
23 for six cycles with each cycle 8 weeks apart. The Evaluation of Subcutaneous  
24 Proleukin in a Randomized International Trial (ESPRIT) delivered  $7.5 \times 10^6$  IU twice  
25 daily for 5 days for 3 cycles with each cycle 8 weeks apart. In both trials  
26 aldesleukin induced an increase in CD4<sup>+</sup> cell count as compared to antiretroviral  
27 therapy alone. However, no additional clinical benefit was observed in the  
28 aldesleukin plus antiretroviral therapy groups. Neither the SILCAAT nor ESPRIT trial  
29 included a mechanistic analysis so it is unclear if the aldesleukin therapy induced a  
30 population of Tregs that may have blunted the Teff function[18].  
31  
32

33 A combination phase 1 trial of rapamycin and aldesleukin in recently diagnosed  
34 patients with T1D has been reported. The rationale for this combination originated  
35 from murine studies where rapamycin and IL-2 had been shown to prevent diabetes  
36 but not to reverse it in the NOD model[19]. Additional data from other murine  
37 models suggested that rapamycin selectively inhibits Teff function as compared to  
38 Treg function[20]. Rapamycin was administered at 2 mg per day for 7 days  
39 followed by a dose adjustment to achieve a serum level of 5-10 ng/ml for 12 weeks.  
40 Aldesleukin was commenced concurrently and administered subcutaneously at  $4.5 \times$   
41  $10^6$  IU once a day for 3 days for 4 cycles. The combination treatment resulted in  
42 a transient decrease in pancreatic beta function (as measured by C-peptide decline)  
43 that resolved after discontinuation of the rapamycin. As preservation of residual  
44 insulin production in the pancreas is critical to improved clinical outcomes, further  
45 studies in patients with T1D should avoid combining rapamycin and IL-2[21].  
46  
47

48 Two recent successful trials of low dose aldesleukin in Graft versus Host Disease  
49 (GVHD) and Hepatitis C virus (HCV) induced Vasculitis (VASCU-IL2) have been  
50 reported. Patients with chronic GVHD who were resistant to glucocorticoid therapy were  
51 treated with either  $0.3 \times 10^6$ ,  $1 \times 10^6$  or  $3 \times 10^6$  IU/m<sup>2</sup>/day of aldesleukin for 8  
52 weeks. The numbers of CD4 Tregs increased in all patients without an increase in  
53 Teff cells. Patients had sustained clinical responses with extended therapy and this  
54 enabled tapering of glucocorticoids[22]. HCV vasculitis patients were treated with  $1.5$   
55  $\times 10^6$  IU once a day for 5 days followed by  $3 \times 10^6$  IU for 5 days for three cycles  
56 on weeks 3, 6 and 9. The proportion of Treg cells increased during treatment  
57 without an increase in Teff cells. Increased natural killer cells and an eosinophilia  
58  
59  
60

1  
2  
3 were also noted with aldesleukin treatment. Overall patients with HCV vasculitis, an  
4 autoimmune condition, demonstrated clinical improvement on this regimen[23].  
5

6 There is substantial non-clinical, preclinical and clinical data that IL-2 (aldesleukin)  
7 therapy can arrest the autoimmune mediated destruction of pancreatic beta cells by  
8 induction of functional Tregs that inhibit islet specific autoreactive T cells. However,  
9 prior to embarking on large proof of concept trials in type 1 diabetes it is essential  
10 that the dose of IL-2 that induces an increase in Treg population while resolving  
11 qualitative defects is determined.  
12

## 13 14 15 **Methods**

### 16 17 **Study design**

18  
19 The DILT1D study is a 9 week, single centre non-randomised, single dose, open  
20 label, adaptive dose finding trial. The study includes 11 visits: a screening visit, a  
21 treatment day, four visits to monitor the response to a dose of ultra low dose IL-2,  
22 four visits to monitor the duration of response, and a final follow up visit on day 60  
23 (Figure 1). The DILT1D study has two phases: a learning phase and an adaptive  
24 phase. At the start of the study (learning phase) the first ten participants will receive  
25 doses 0.04, 0.16, 0.6, 1,  $1.5 \times 10^6$  IU/m<sup>2</sup> of IL-2, in ascending order with each of  
26 the doses being given to two patients before escalating the dose, and with at least a  
27 week between pairs of recruits. In the subsequent adaptive phase the data will be  
28 analysed sequentially after each subject is observed by fitting a candidate set of  
29 statistical models to the dose-response curve. Each model will provide an estimate  
30 and standard error (SE) of the doses that achieve the two targets of a minimum  
31 Treg increase and a therapeutic Treg increase. Each model will also provide a  
32 recommended dose to assign to the next patient. The choice of doses will be  
33 approved by a Dose Determining Committee (DDC) in the light of the reports and  
34 recommendations provided. The maximum dose of IL-2 that can be assigned is  $1.5$   
35  $\times 10^6$  IU/m<sup>2</sup>. The study has been approved by Health Research Authority, National  
36 Regulatory Ethics Service (13/EE/0020).  
37  
38  
39  
40

### 41 **Dose Determining Committee**

42  
43 The scope of the DDC is to review the interim analysis after the first ten trial  
44 participants and then provide decisions regarding the choice of dose to administer to  
45 subsequent participants. The DDC will also review all safety data accumulated in the  
46 trial at each meeting. The DDC will be comprised of a statistician, physician and  
47 scientist drawn from the members of the Trial Management Committee or named in  
48 the trial delegation log. More than one member from each role (statistician,  
49 physician and scientist) can attend the meeting but each role is only allowed a single  
50 vote at the DDC meeting. A statistician, a clinician, and a scientist are required to  
51 attend to reach a quorate. Decisions at the DDC meeting can be reached by a  
52 majority vote. The Trial Steering Committee can be called upon by the Chair to  
53 review any decisions that cannot be agreed upon if requested to by other member(s)  
54 of the DDC. Given the safety role of the DDC, the Chair is the Chief Investigator or if  
55 unavailable, the Chief Investigator may delegate the chair to another physician.  
56  
57  
58  
59  
60

1  
2  
3 After the tenth participant has completed seven days of follow up after  
4 administration of the drug, data will be extracted from the trial database and  
5 analyzed. The interim analysis will be performed by the members of the Trial  
6 Management Committee and will be delivered to the DDC within ten working days of  
7 this date for review. Following the interim analysis, data will be extracted from the  
8 trial database after each patient has completed seven days of follow-up. A report  
9 generated from the data will be delivered to the DDC within one to two working days  
10 of this date, the tight timelines enabling the next dose to be prescribed for a patient  
11 treated at the start of the following week.  
12  
13

14 The report generated from the data by the trial statistician for the DDC to review will  
15 include: plots of all the patient profiles (Treg response versus time); plots of the  
16 sequence of doses; a scatter plot of the primary endpoint (maximal percentage  
17 change of Treg, log-transformed) versus dose; the same scatter plot of the primary  
18 endpoint versus dose with superimposed fitted models with 95% confidence bands  
19 for a list of statistical models; estimated target doses and confidence intervals;  
20 residual plots of each model fitted; raw output from statistical packages to double-  
21 check on convergence; and finally a choice of dose decisions for future patients. The  
22 statistical models will initially include: Linear, Quadratic, Cubic, Emax, Emax4 (four  
23 parameter) and Logistic (four parameter).  
24  
25  
26

### 27 **Study participants and recruitment**

28  
29 Potential participants will need to provide written informed consent before  
30 undergoing any trial related procedures, including screening. Eligible Participants will  
31 have a history of T1D with a duration of diabetes less than 24 months from  
32 diagnosis and be positive for at least one autoantibody (Box 1). Participants will be  
33 excluded if they have a history or evidence of severe organ dysfunction, unstable  
34 type 1 diabetes, pregnancy, malignancy, active autoimmune thyroid disease, active  
35 clinical infection, hepatitis B or C, HIV and/or organ transplantation (Box 2).  
36  
37

38 Potential participants can be informed of the study by several different systems  
39 depending on geographical location and participant preference. For local recruitment  
40 potential participants will be identified by their treating physicians, diabetes nurses  
41 and research nurses at Addenbrooke's hospital or approved patient information  
42 sites. The contact details of identified potential participants, with their agreement,  
43 will be passed to the study team. For national recruitment participants who have  
44 registered with the ADDRESS-2 register [24] or the D-GAP study [25] will be  
45 contacted to determine if they are interested in enrolling in the study. Details of the  
46 study will also be provided to patient groups and charities and will be posted on  
47 [www.clinical-trials-type1-diabetes.com](http://www.clinical-trials-type1-diabetes.com). There will also be a Facebook page and  
48 twitter feed for this study.  
49  
50  
51

### 52 **The DILT1D study outcome measures**

53  
54 The primary endpoint is based upon the percentage of CD4<sup>+</sup> T regulatory (defined as  
55 CD3<sup>+</sup>CD4<sup>+</sup>CD25<sup>high</sup>CD127<sup>low</sup>) cells within the CD3<sup>+</sup> CD4<sup>+</sup> T cell gate following  
56 treatment with IL-2 as measured by Fluorescence activated cell sorting (FACS). The  
57 maximum value observed in each patient's profile over the first seven days of the  
58  
59  
60



1  
2  
3 follow-up period will be identified and the percentage change from the baseline  
4 value defines the primary endpoint.  
5

6 The following secondary outcomes will be measured following IL-2 treatment:  
7

- 8 • Change in T regulatory cell number, phenotype and proliferation will be  
9 measured by FACS.
- 10 • Change in T regulatory cell epigenetic profile.
- 11 • Change in T effector cell number, proliferation and phenotype will be  
12 measured by FACS.
- 13 • Change in lymphocyte cell number, proliferation and phenotype subsets and  
14 NK and NKT cells will be measured by FACS and full blood count.
- 15 • Change in cytokines and soluble receptors
- 16 • Change in metabolic control as measured by self-monitoring of blood glucose  
17 (SMBG), laboratory measurement of blood glucose and HbA1c and C-peptide.  
18  
19

20  
21 The following exploratory endpoints will be measured:  
22

- 23 • Change in intracellular T and NK cell signaling will be measured ex vivo by  
24 FACS following IL-2 treatment. An in vitro dose response to IL-2 will also be  
25 performed to assess durable changes in intracellular T cell signaling.  
26
- 27 • Change in Treg function will be measured by T cell suppression assay.  
28
- 29 • Change in T cell, NK and peripheral blood mononuclear cell gene expression.  
30
- 31 • Subjects will be characterized for genotypes at type 1 diabetes susceptibility  
32 genes related to the IL-2 pathway.  
33  
34  
35  
36

### 37 Safety assessments

38 Safety and tolerability assessments will include clinical history, insulin use, physical  
39 examination, temperature, blood pressure, heart rate, 12-Lead electrocardiogram  
40 (ECGs), glucose, HbA1c, clinical laboratory tests and adverse event recording.  
41  
42

### 43 **Fluorescence activated cell sorting measurements and mechanistic analysis**

44 The FACS for T regulatory cell (CD3, CD4, CD25, CD127) counts and proportions  
45 (%) that define the primary endpoint will be performed at the Department of  
46 Immunology, Addenbrooke's Hospital, Cambridge, a clinical laboratory that has been  
47 approved for good clinical practice (GCP). This assay will be carried out in a blinded  
48 fashion without the operators knowing the dose allocation for participants. The non  
49 clinical mechanistic analysis for the secondary and exploratory endpoints for FACS  
50 immunophenotyping, Treg epigenetics, intracellular T and NK cell signaling, T cell  
51 function genotype, gene expression analysis will be performed at the JDRF/Wellcome  
52 Trust Diabetes and Inflammation Laboratory (DIL), Cambridge Institute of Medical  
53 Research, University of Cambridge, Cambridge.  
54  
55  
56  
57  
58  
59  
60

## Statistical methods

As an exploratory dose-finding study a formal sample size calculation is not appropriate. Simulation work shows that a sample size of 40 patients will give informative estimates of the target doses, assuming the underlying dose-response relationship can achieve the target responses within a safe range of doses and the between-patient variability does not dominate the dose-response relationship too much to be of practical clinical use.

A dose-response curve describing the relationship between the primary endpoint and the dose will be fitted for a selection of parametric models. Estimates and standard errors for all parameters, including the inter-patient variability, will be provided for all models, as well as an assessment of the goodness-of-fit for each model[26]. An estimate, standard error, and 95% confidence intervals will be produced for the doses associated with each of the different modelling assumptions that achieve the target response rates

The target response rates are those that achieve a:

1. Minimal Treg increase
2. Maximal Treg increase

However the numerical values that define these increases will only be defined in the light of the data provided by the initial ten subjects. After analysis by the DDC and following review by the TSC) these targets will be fixed for the course of the trial.

Summary statistics of all endpoints measured at baseline will be produced. Continuous variables will report sample size, mean, standard deviation, median, minimum and maximum. Categorical or binary variables will report sample size, counts, and percentages.

All secondary and exploratory endpoints measured after treatment will be explored using graphical methods, such as scatter plots, to examine their relationship to dose and other explanatory endpoints measured at baseline. A regression framework will be used to quantify such relationships, allowing for adjustments for baseline covariates and time-point; transformations of the response variable will be made where appropriate, and allowances for correlations within subjects and/or within related endpoints will be made.

## Discussion

Previous clinical trials involving the treatment of patients with newly diagnosed T1D with potential immunotherapeutics have embarked on large proof of concept trials without first establishing the correct dose of the experimental agent in order to achieve the desired immunological outcome. Doses have been usually derived from experience of an agent in another disease entity such as in the case of teplizumab (non-Fc-binding anti-CD3) where the dose used in T1D is the same as that used in renal transplantation (OKT3)[27]. Similarly, the doses of rituximab (anti-CD20) and abatacept (CTLA-4Ig) when used to treat T1D have been derived from clinical experience in rheumatoid arthritis[28-31]. In the case of otelexizumab (non-FcR-binding anti-CD3), experience from murine models was combined with limited human data to arrive at a dose. This has led, despite considerable efforts, to suboptimal outcomes in clinical trials of these agents; and in the case of otelexizumab, a complete failure due to a lack of therapeutic effect in humans[32].

It is clear that new strategies need to be developed to rapidly determine the mechanisms of action of immunotherapeutic agents in patients with type 1 diabetes prior to embarking on large phase II/III clinical trials.

The main goals of this adaptive mechanistic trial are: To establish the best doses of IL-2 to administer in patients with T1D in order to:

- A. induce a minimal Treg increase
- B. induce a maximal Treg increase

Secondary goals are:

1. To determine the duration of Treg response from a single dose of IL-2
2. To investigate the utility of biomarkers of IL-2 responsiveness in treated individuals

Administration of a single ultra low dose of IL-2 to patients with T1D will enable the determination of the response of the Treg population in this disease. By monitoring the Treg population over subsequent days and weeks we can determine the duration of the Treg population increase in frequency and function and the return to baseline. It is essential that the optimal dose and duration of response of Tregs be established in T1D prior to the initiation of any future trials of IL-2. Both the dose and the frequency of dosing will determine if aldesleukin is clinically acceptable for the long term treatment of T1D. An empirically derived dose based on experience in other diseases may not be beneficial in T1D since both the treatment protocols used in GVHD and HCV vasculitis gave a large rise in Treg population (8 and 4 fold rise in Tregs from baseline, respectively) and alterations of Treg frequency is not a feature of T1D. Our aim in T1D will be cause a small or physiological (0-0.25 fold) sustained increase in Treg frequency and function that may be maintained over the long term to induce tolerance to insulin-producing pancreatic beta cells. This trial will provide the opportunity to determine the minimum dose of IL-2 that could be used to initiate treatment of patients with newly diagnosed T1D, and, in the future, to test the

1  
2  
3 possibility that ULD IL-2 can prevent the onset of autoimmunity, which occurs many  
4 years before disease diagnosis. In addition, it will provide data regarding the  
5 duration of Treg response which can be used to estimate the frequency of IL-2  
6 dosing in future trials.  
7

8  
9 An adaptive trial design is well suited to determine the dose response of Tregs to IL-  
10 2 therapy. Tregs are an appropriate biomarker since they are highly responsive to  
11 IL-2 therapy in humans at ULD and defects in their function are key to the  
12 development of T1D. By use of an adaptive design, following the learning phase of  
13 the trial where the first ten start-up patients receive pre-specified doses, Treg data  
14 from each subject treated can be used to inform the IL-2 dose administered to  
15 subsequent individuals in the trial thereby more efficiently accessing the dose  
16 outcome relationship. In this manner Treg data from all patients enrolled will be  
17 used. Compared to a standard dosing trial an adaptive design has the advantage of  
18 not having to make definitive decisions prior to trial regarding dose and allocation to  
19 pre designated treatment groups.  
20  
21

22 By targeting the IL-2 pathway, one of the key aetiological pathways causing  
23 susceptibility to T1D, it will be possible to examine if IL-2 therapy rectifies known  
24 deficiencies by analysis of associated biomarkers. Individual subjects will have their  
25 T cell subsets followed longitudinally and characterised by deep immunophenotyping  
26 before and after treatment to determine the effects on CD25 and FOXP3 expression.  
27 Monitoring for increased proliferation (Ki-67) and the emergence of recent thymic  
28 emigrants (CD31<sup>+</sup> cells, increased T cell receptor excision circles) will be performed.  
29 The stability of Tregs will be determined by phenotype (FOXP3, CTLA-4) and by  
30 epigenetic analysis of the regulatory regions of FOXP3 and genes associated with  
31 Treg function. Measurement of intracellular pSTAT5 signaling in lymphocytes will  
32 establish if qualitative defects in IL-2 signaling in T1D are corrected by therapy.  
33 Analysis of this panel of biomarkers may determine if individual or combinations of  
34 assays may be useful in future trials to stratify T1D patients on their ability to  
35 respond to IL-2 treatment.  
36  
37  
38  
39  
40  
41  
42  
43  
44  
45  
46  
47  
48  
49  
50  
51  
52  
53  
54  
55  
56  
57  
58  
59  
60

## Acknowledgments

The authors acknowledge the assistance and support of the Cambridge Clinical Trial Unit for trial co-ordination. The NIHR Wellcome Trust Clinical Research Facility, Addenbrooke's Centre for Clinical Investigation (ACCI) for clinical facilities. Sarah Nutland and Simon Hacking at the Cambridge BioResource for assistance with study set up and publicity. Helen Stevens, Vin Everett and Sundeep Nanuwa for logistical and web development at JDRF/Wellcome Trust Diabetes and Inflammation Laboratory, Cambridge Institute for Medical Research. The generous participation and contributions of the volunteers in the study are very gratefully acknowledged.

## Competing interests

FWL has received fees for consulting on type 1 diabetes from GlaxoSmithKline and funds to support research from F Hoffmann-La Roche.

## Funding

This work is funded by the JDRF (9-2011-253), the Wellcome Trust (091157) and the National Institute for Health Research (NIHR) Cambridge Biomedical Research Centre. The research leading to these results has received funding from the European Union's 7th Framework Programme (FP7/2007-2013) under grant agreement no. 241447 (NAIMIT). The Cambridge Institute for Medical Research (CIMR) is in receipt of a Wellcome Trust Strategic Award (100140).

## Contributors

FWL is the chief investigator of the study, led protocol development, REC submission and presentation, design of study governance and wrote the manuscript. PK, KI and MW contributed to protocol development and coordinated REC application. SB and AW developed the statistical design for the study and wrote the statistical sections of the protocol. LW, JT and FWL had the original idea for the study and coordinated the assay development for the study. All authors reviewed the protocol.

## Ethical Approval, trial registration and commencement of enrolment

Ethical approval for the study was granted 18th February 2013 by the Health Research Authority, National Regulatory Ethics Service (13/EE/0020). The trial was approved for inclusion in clinical research network portfolio (Diabetes Research Network 767) on the 21st of January 2013. The trial was registered with International Standard Randomised Controlled Trial Number Register (ISRCTN27852285) on 26th of March 2013 and at ClinicalTrials.gov (NCT01827735) on the 4th of April 2013. The first participant was consented on the 8th of March 2013.

## References

1. Patterson CC, Dahlquist GG, Gyurus E, et al. Incidence trends for childhood type 1 diabetes in Europe during 1989-2003 and predicted new cases 2005-20: a multicentre prospective registration study. *Lancet* 2009;**373**(9680):2027-33 doi: S0140-6736(09)60568-7 [pii] 10.1016/S0140-6736(09)60568-7 [doi][published Online First: Epub Date]].
2. Daneman D. Type 1 diabetes. *Lancet* 2006;**367**(9513):847-58 doi: S0140-6736(06)68341-4 [pii] 10.1016/S0140-6736(06)68341-4 [doi][published Online First: Epub Date]].
3. Group DCaCTR. The effect of intensive treatment of diabetes on the development and progression of long-term complications in insulin-dependent diabetes mellitus. The Diabetes Control and Complications Trial Research Group. *N Engl J Med* 1993;**329**(14):977-86
4. Group DCaCTR. Hypoglycemia in the Diabetes Control and Complications Trial. *Diabetes* 1997;**46**(2):271-86
5. Steffes MW, Sibley S, Jackson M, et al. Beta-cell function and the development of diabetes-related complications in the diabetes control and complications trial. *Diabetes Care* 2003;**26**(3):832-6
6. Todd JA. Etiology of type 1 diabetes. *Immunity* 2010;**32**(4):457-67 doi: S1074-7613(10)00126-3 [pii]10.1016/j.immuni.2010.04.001[published Online First: Epub Date]].
7. Todd JA, Walker NM, Cooper JD, et al. Robust associations of four new chromosome regions from genome-wide analyses of type 1 diabetes. *Nat Genet* 2007;**39**(7):857-64 doi: ng2068 [pii]10.1038/ng2068[published Online First: Epub Date]].
8. Dendrou CA, Plagnol V, Fung E, et al. Cell-specific protein phenotypes for the autoimmune locus IL2RA using a genotype-selectable human bioresource. *Nat Genet* 2009;**41**(9):1011-5 doi: ng.434 [pii] 10.1038/ng.434[published Online First: Epub Date]].
9. Yamanouchi J, Rainbow D, Serra P, et al. Interleukin-2 gene variation impairs regulatory T cell function and causes autoimmunity. *Nat Genet* 2007;**39**(3):329-37 doi: ng1958 [pii]10.1038/ng1958[published Online First: Epub Date]].
10. Delgoffe GM, Kole TP, Zheng Y, et al. The mTOR kinase differentially regulates effector and regulatory T cell lineage commitment. *Immunity* 2009;**30**(6):832-44 doi: S1074-7613(09)00237-4 [pii]10.1016/j.immuni.2009.04.014[published Online First: Epub Date]].
11. Burchill MA, Yang J, Vogtenhuber C, et al. IL-2 receptor beta-dependent STAT5 activation is required for the development of Foxp3+ regulatory T cells. *J Immunol* 2007;**178**(1):280-90 doi: 178/1/280 [pii][published Online First: Epub Date]].
12. Dendrou CA, Wicker LS. The IL-2/CD25 pathway determines susceptibility to T1D in humans and NOD mice. *J Clin Immunol* 2008;**28**(6):685-96 doi: 10.1007/s10875-008-9237-9[published Online First: Epub Date]].
13. Doyle MV, Lee MT, Fong S. Comparison of the biological activities of human recombinant interleukin-2(125) and native interleukin-2. *J Biol Response Mod* 1985;**4**(1):96-109
14. Fyfe G, Fisher RI, Rosenberg SA, et al. Results of treatment of 255 patients with metastatic renal cell carcinoma who received high-dose recombinant interleukin-2 therapy. *J Clin Oncol* 1995;**13**(3):688-96
15. Rosenberg SA, Yang JC, White DE, et al. Durability of complete responses in patients with metastatic cancer treated with high-dose interleukin-2: identification of the antigens mediating response. *Ann Surg* 1998;**228**(3):307-19
16. Negrier S, Escudier B, Lasset C, et al. Recombinant human interleukin-2, recombinant human interferon alfa-2a, or both in metastatic renal-cell carcinoma. Groupe Français d'Immunothérapie. *N Engl J Med* 1998;**338**(18):1272-8 doi: 10.1056/NEJM199804303381805[published Online First: Epub Date]].

17. Yang JC, Sherry RM, Steinberg SM, et al. Randomized study of high-dose and low-dose interleukin-2 in patients with metastatic renal cancer. *J Clin Oncol* 2003;21(16):3127-32 doi: JCO.2003.02.122 [pii]10.1200/JCO.2003.02.122[published Online First: Epub Date]].
18. Abrams D, Lévy Y, Losso MH, et al. Interleukin-2 therapy in patients with HIV infection. *N Engl J Med* 2009;361(16):1548-59 doi: 361/16/1548 [pii]10.1056/NEJMoa0903175[published Online First: Epub Date]].
19. Rabinovitch A, Suarez-Pinzon WL, Shapiro AM, et al. Combination therapy with sirolimus and interleukin-2 prevents spontaneous and recurrent autoimmune diabetes in NOD mice. *Diabetes* 2002;51(3):638-45
20. Turnquist HR, Raimondi G, Zahorchak AF, et al. Rapamycin-conditioned dendritic cells are poor stimulators of allogeneic CD4+ T cells, but enrich for antigen-specific Foxp3+ T regulatory cells and promote organ transplant tolerance. *J Immunol* 2007;178(11):7018-31 doi: 178/11/7018 [pii][published Online First: Epub Date]].
21. Long SA, Rieck M, Sanda S, et al. Rapamycin/IL-2 Combination Therapy in Patients with Type 1 Diabetes Augments Tregs yet Transiently Impairs  $\beta$ -Cell Function. *Diabetes* 2012 doi: db12-0049 [pii]10.2337/db12-0049[published Online First: Epub Date]].
22. Koreth J, Matsuoka K, Kim HT, et al. Interleukin-2 and regulatory T cells in graft-versus-host disease. *N Engl J Med* 2011;365(22):2055-66 doi: 10.1056/NEJMoa1108188[published Online First: Epub Date]].
23. Saadoun D, Rosenzweig M, Joly F, et al. Regulatory T-cell responses to low-dose interleukin-2 in HCV-induced vasculitis. *N Engl J Med* 2011;365(22):2067-77 doi: 10.1056/NEJMoa1105143[published Online First: Epub Date]].
24. ADDRESS2. After Diabetes Diagnosis REsearch Support System (ADDRESS). <http://wwwaddress2.org> 2014
25. DGAP. Diabetes: Genes, auto-immunity and prevention. <http://paediatricmedschlcamacuk/research/clinical-trials/d-gap-diabetes-genes-auto-immunity-and-prevention/> 2014
26. Dette H, Bornkamp B, Bretz F. On the efficiency of two-stage response-adaptive designs. *Stat Med* 2012;32(10):1646-60 doi: 10.1002/sim.5555[published Online First: Epub Date]].
27. Group OMTS. A randomized clinical trial of OKT3 monoclonal antibody for acute rejection of cadaveric renal transplants. *N Engl J Med* 1985;313(6):337-42 doi: 10.1056/nejm198508083130601[published Online First: Epub Date]].
28. Pescovitz MD, Greenbaum CJ, Krause-Steinrauf H, et al. Rituximab, B-lymphocyte depletion, and preservation of beta-cell function. *N Engl J Med* 2009;361(22):2143-52 doi: 361/22/2143 [pii] 10.1056/NEJMoa0904452[published Online First: Epub Date]].
29. Kremer JM, Dougados M, Emery P, et al. Treatment of rheumatoid arthritis with the selective costimulation modulator abatacept: twelve-month results of a phase iib, double-blind, randomized, placebo-controlled trial. *Arthritis Rheum* 2005;52(8):2263-71 doi: 10.1002/art.21201 [doi][published Online First: Epub Date]].
30. Orban T, Bundy B, Becker DJ, et al. Co-stimulation modulation with abatacept in patients with recent-onset type 1 diabetes: a randomised, double-blind, placebo-controlled trial. *Lancet* 2011;378(9789):412-9 doi: S0140-6736(11)60886-6 [pii] 10.1016/S0140-6736(11)60886-6[published Online First: Epub Date]].
31. Edwards JC, Szczepanski L, Szechinski J, et al. Efficacy of B-cell-targeted therapy with rituximab in patients with rheumatoid arthritis. *N Engl J Med* 2004;350(25):2572-81 doi: 350/25/2572 [pii]10.1056/NEJMoa032534[published Online First: Epub Date]].
32. Defend-1. Trial of Otelixizumab for Adults With Newly Diagnosed Type 1 Diabetes Mellitus (Autoimmune): DEFEND-1. <http://clinicaltrials.gov/ct2/show/NCT00678886> 2010

**Box 1 Inclusion Criteria**

Type 1 diabetes  
18-50 years of age  
Duration of diabetes less than 24 months from diagnosis  
At least one positive autoantibody (anti-islet cell, anti-GAD, anti-IA2, anti-ZnT8)  
Written informed consent

**Box 2 Exclusion Criteria**

Hypersensitivity to aldesleukin or any of the excipients  
History of severe cardiac disease  
History of malignancy within the past 5 years (with the exception of localized carcinoma of the skin that had been resected for cure or cervical carcinoma *in situ*)  
History or concurrent use of immunosuppressive agents or steroids.  
History of unstable diabetes with recurrent hypoglycaemia  
Active autoimmune hyper or hypothyroidism  
Active clinical infection  
Major pre-existing organ dysfunction or previous organ allograft  
Females who are pregnant, lactating or intend to get pregnant during the study  
Males who intend to father a pregnancy during the study  
Donation of more than 500 ml of blood within 2 months prior to aldesleukin administration  
Participation in a previous therapeutic clinical trial within 2 months prior to aldesleukin administration  
Abnormal ECG  
Abnormal full blood count, chronic renal failure (Stage 3,4,5) and/or evidence impaired liver function  
Positive HBsAg or HepC serology or HIV test  
Any medical history or clinically relevant abnormality that is deemed by the principal investigator and/or medical monitor to make the patient ineligible for inclusion because of a safety concern

**Figure 1.** Study design for adaptive phase of DILT1D. The primary endpoint of the study is the maximum percentage increase in Tregs from baseline over the first 7 days following treatment with ULD IL-2. The T regulatory data from all participants treated is then used to inform the IL-2 dose administered to subsequent participants thereby more efficiently accessing the dose outcome relationship.



**Title**

Rationale and study design of the Adaptive study of IL-2 dose on regulatory T cells in type 1 diabetes (DILT1D) [a non randomised, open label, adaptive dose finding trial.](#)

Frank Waldron-Lynch<sup>1\*</sup>, Paula Kareclas<sup>2</sup>, Kathryn Irons<sup>2</sup>, Neil Walker<sup>1</sup>, Adrian Mander<sup>3</sup>, Linda Wicker<sup>1</sup>, John Todd<sup>1</sup>, Simon Bond<sup>2</sup>.

<sup>1</sup>JDRF/Wellcome Trust Diabetes & Inflammation Laboratory, Cambridge Institute for Medical Research, University of Cambridge, Addenbrooke's Hospital, Hills Road, Cambridge CB2 0XY, United Kingdom.

<sup>2</sup>Cambridge Clinical Trials Unit, Cambridge University Hospitals NHS Foundation Trust, Addenbrooke's Hospital, Hills Road, Cambridge, CB2 0QQ, United Kingdom.

<sup>3</sup>MRC Biostatistics Unit, Cambridge Institute of Public Health, Forvie Site, Robinson Way, Cambridge CB2 0SR, United Kingdom.

**\*Corresponding author**

Dr Frank Waldron-Lynch,

JDRF/Wellcome Trust Diabetes & Inflammation Laboratory, Cambridge Institute for Medical Research, University of Cambridge, Addenbrooke's Hospital, Hills Road, Cambridge CB2 0XY, United Kingdom.

Email: [frank.waldron-lynch@cimr.cam.ac.uk](mailto:frank.waldron-lynch@cimr.cam.ac.uk).

Telephone: +447872410617

Fax: +441223762102

**Keywords**

Type 1 diabetes, Interleukin-2, Clinical trials, Regulatory T cells, Immunomodulation

**Word count**

1  
2  
3  
4  
5  
6  
7 | [3695\\_3396](#)

## 8 **Abstract**

9  
10 **Introduction:** CD4<sup>+</sup> regulatory T cells (Tregs) are crucial for the maintenance of  
11 self-tolerance and are deficient in many common autoimmune diseases such as type  
12 1 diabetes (T1D). Interleukin-2 (IL-2) plays a major role in the activation and  
13 function of Tregs and treatment with ultra low dose (ULD) IL-2 could increase Treg  
14 function to potentially halt disease progression in T1D. However prior to embarking  
15 on large phase II/III clinical trials it is critical to develop new strategies for  
16 determining the mechanism of action of ULD IL-2 in participants with T1D. In this  
17 mechanistic study we will combine a novel trial design with a clinical grade Treg  
18 assay to identify the best doses of ULD IL-2 to induce targeted increases in Tregs.  
19

20 **Method and analysis:** DILT1D is a single centre non-randomised, single dose, open  
21 label, adaptive dose finding trial. The primary objective of DILT1D is to identify the  
22 best doses of IL-2 to achieve a minimal or maximal Treg increase in participants  
23 with T1D (N=40). The design has an initial learning phase where pairs of patients  
24 are assigned to five pre-assigned doses followed by an interim analysis to determine  
25 the two Treg targets for the remainder of the trial. This will then be followed by an  
26 adaptive phase which is fully sequential with an interim analysis after each patient to  
27 determine the choice of dose based on the optimality criterion to minimise the  
28 determinant of the covariance of the estimated target doses. A Dose Determining  
29 Committee (DDC) will review all data available at the interim(s) and then provide  
30 decisions regarding the choice of dose to administer to subsequent participants.  
31

32 **Ethics and dissemination:** Ethical approval for the study was granted 18th  
33 February 2013. Results of this study will be reported through peer reviewed  
34 journals, conference presentations and an internal organisational report.  
35

36 **Trial registration numbers** NCT01827735, ISRCTN27852285, DRN767  
37  
38  
39  
40  
41  
42  
43  
44  
45  
46  
47  
48  
49  
50  
51  
52  
53  
54  
55  
56  
57  
58  
59  
60

### Strengths and limitations of this study

This is an adaptive dose finding trial that combines a new trial design with the use of immunological biomarkers to develop a new treatment for type 1 diabetes.

The study incorporates detailed experimental medicine mechanistic studies that will investigate the actions of ultra low dose IL-2 on the human immune system.

The adaptive study design has required the development of new trial governance structures to allow data generated in the study to be rapidly analysed and utilised to inform dosing decisions.

The study ~~does~~ not aim to determine the metabolic effects of treatment.

## Introduction

Type 1 diabetes (T1D) is the most common severe chronic autoimmune disease worldwide. The incidence of type 1 diabetes is rising rapidly with a predicted increase in paediatric cases of 70% over the next 15 years in Europe[1]. The aetiology of type 1 diabetes is the autoimmune (loss of self tolerance) mediated destruction of the insulin producing pancreatic beta cells leading to insulin deficiency and development of hyperglycaemia[2]. At present, medical management of T1D focuses on intensive insulin replacement therapy to limit microvascular complications (retinopathy, nephropathy, neuropathy). Despite incremental improvement over the last 90 years clinical outcomes remain suboptimal with fewer than 5% of patients in the intensively treated group of the pivotal Diabetes Control and Complications Trial achieving glycaemic targets[3]. The limiting factor for achieving euglycemia was hypoglycaemia as a result of exogenous insulin treatment. That is the tighter the glycaemic control the greater the frequency of hypoglycaemia[4]. However, patients who had residual endogenous insulin function had a reduced level of microvascular complications and hypoglycaemia, which was most likely due to the preservation of the counter regulator responses to low blood sugars[5]. These findings have led intensive efforts to arrest the autoimmune process by novel immunotherapy and thereby preserve residual insulin production leading to improved clinical outcomes in type 1 diabetes.

Genome wide association studies have found that most genes contributing to T1D susceptibility encode proteins involved in immune regulation and immune function[6]. In particular, several of the proteins are part of the interleukin 2 (IL-2) pathway that regulates T cell activation and tolerance to self antigens: IL-2, CD25, the alpha chain of the IL-2 receptor (*IL2RA*), BACH2 and protein tyrosine phosphatase non-receptor type 2 (PTPN2)[7]. Phenotypic characterisation of CD25 expression on CD4 T cell subsets has demonstrated that individuals carrying susceptibility alleles at *IL2RA* have memory CD4 T cells with reduced CD25 expression and less production of IL-2 upon activation[8]. Physiologically, IL-2 expression and signalling via the high affinity trimeric IL-2 receptor is essential for the maintenance of self tolerance and the prevention of autoimmunity[9].

Treg and T effector (Teff) cells differ in their abilities to respond to IL-2 due to their distinct CD25 levels and the balance of their intracellular signalling molecules. In response to IL-2, Tregs intracellularly signal primarily via the pSTAT5 pathway while Teffs also activate the MAPK and PI3K/AKT pathways[10 11]. Importantly, Tregs have a greater sensitivity to IL-2 due to their higher expression of the high affinity IL-2 receptor compared to Teff cells. Natural killer (NK) cells also require higher concentrations of IL-2 to be activated since this subset primarily expresses the intermediate affinity IL-2 receptor that is composed of dimers of the beta and gamma chains[12]. The higher sensitivity of Tregs for IL-2 opens a therapeutic window where ultra low doses of IL-2 therapy can be used to enhance Treg responses in patients with T1D.

Aldesleukin or Proleukin is a human recombinant IL-2 product produced by recombinant DNA technology using a genetically engineered *E. coli* strain expressing an analogue of the human IL-2 gene. The *in vitro* biological activities of the native non-recombinant compound have been reproduced with aldesleukin[13]. Aldesleukin is produced by Prometheus Laboratories on behalf of Novartis Vaccine and Diagnostics.

1  
2  
3  
4  
5  
6  
7  
8 High dose aldesleukin is currently indicated for the treatment of adults with  
9 metastatic renal cell cancer (RCC)[14] and metastatic melanoma skin cancer[15].  
10 Initial clinical trials in metastatic RCC administered intravenously  $18 \times 10^6$  IU of  
11 aldesleukin every 8 hours for a maximum of 14 days. Following 9 days of rest a  
12 further 14 doses were administered. Less than 10% of patients had a complete  
13 response to IL-2 therapy[16]. Alternative regimens with subcutaneous aldesleukin  
14 have also been used. Aldesleukin is administered at  $18 \times 10^6$  IU every day for 5  
15 days, followed by 2 days of rest. For the following 3 weeks  $18 \times 10^6$  IU is  
16 administered on days 1 and 2 of each week followed by  $9 \times 10^6$  IU on days 3-5. On  
17 days 6 and 7 no drug is administered. After 1 week rest this 4 week cycle is  
18 repeated[16]. The reduced dose regimens, though minimising side effects, yield  
19 substantially lower clinical responses than the high dose protocol and are not  
20 considered effective treatment of metastatic renal cell carcinoma[17].

21 In patients with HIV, clinical trials of aldesleukin therapy have been conducted to  
22 determine if increasing the CD4<sup>+</sup> T cell count would improve clinical outcomes  
23 (opportunistic disease or death from any cause). The Subcutaneous Recombinant  
24 Interleukin-2 in HIV Patients with Low CD4<sup>+</sup> Counts under Active Antiretroviral  
25 Therapy (SILCAAT) trial administered a dose of  $4.5 \times 10^6$  IU twice daily for 5 days  
26 for six cycles with each cycle 8 weeks apart. The Evaluation of Subcutaneous  
27 Proleukin in a Randomized International Trial (ESPRIT) delivered  $7.5 \times 10^6$  IU twice  
28 daily for 5 days for 3 cycles with each cycle 8 weeks apart. In both trials  
29 aldesleukin induced an increase in CD4<sup>+</sup> cell count as compared to antiretroviral  
30 therapy alone. However, no additional clinical benefit was observed in the  
31 aldesleukin plus antiretroviral therapy groups. Neither the SILCAAT nor ESPRIT trial  
32 included a mechanistic analysis so it is unclear if the aldesleukin therapy induced a  
33 population of Tregs that may have blunted the Teff function[18].

34 A combination phase 1 trial of rapamycin and aldesleukin in recently diagnosed  
35 patients with T1D has been reported. The rationale for this combination originated  
36 from murine studies where rapamycin and IL-2 had been shown to prevent diabetes  
37 but not to reverse it in the NOD model[19]. Additional data from other murine  
38 models suggested that rapamycin selectively inhibits Teff function as compared to  
39 Treg function[20]. Rapamycin was administered at 2 mg per day for 7 days  
40 followed by a dose adjustment to achieve a serum level of 5-10 ng/ml for 12 weeks.  
41 Aldesleukin was commenced concurrently and administered subcutaneously at  $4.5 \times$   
42  $10^6$  IU once a day for 3 days for 4 cycles. The combination treatment resulted in a  
43 transient decrease in pancreatic beta function (as measured by C-peptide decline)  
44 that resolved after discontinuation of the rapamycin. As preservation of residual  
45 insulin production in the pancreas is critical to improved clinical outcomes, further  
46 studies in patients with T1D should avoid combining rapamycin and IL-2[21].

47 Two recent successful trials of low dose aldesleukin in Graft versus Host Disease  
48 (GVHD) and Hepatitis C virus (HCV) induced Vasculitis (VASCU-IL2) have been  
49 reported. Patients with chronic GVHD who were resistant to glucocorticoid therapy were  
50 treated with either  $0.3 \times 10^6$ ,  $1 \times 10^6$  or  $3 \times 10^6$  IU/m<sup>2</sup>/day of aldesleukin for 8  
51 weeks. The numbers of CD4 Tregs increased in all patients without an increase in  
52 Teff cells. Patients had sustained clinical responses with extended therapy and this  
53 enabled tapering of glucocorticoids[22]. HCV vasculitis patients were treated with  $1.5$   
54  $\times 10^6$  IU once a day for 5 days followed by  $3 \times 10^6$  IU for 5 days for three cycles  
55 on weeks 3, 6 and 9. The proportion of Treg cells increased during treatment  
56  
57  
58  
59  
60

1  
2  
3  
4  
5  
6  
7 without an increase in Teff cells. Increased natural killer cells and an eosinophilia  
8 were also noted with aldesleukin treatment. Overall patients with HCV vasculitis, an  
9 autoimmune condition, demonstrated clinical improvement on this regimen[23].

10 There is substantial non-clinical, preclinical and clinical data that IL-2 (aldesleukin)  
11 therapy can arrest the autoimmune mediated destruction of pancreatic beta cells by  
12 induction of functional Tregs that inhibit islet specific autoreactive Teffs. However,  
13 prior to embarking on large proof of concept trials in type 1 diabetes it is essential  
14 that the dose of IL-2 that induces an increase in Treg population while resolving  
15 qualitative defects is determined.

## 16 17 18 **Methods**

### 19 20 **Study design**

21 The DILT1D study is a 9 week, single centre non-randomised, single dose, open  
22 label, adaptive dose finding trial. The study includes 11 visits: a screening visit, a  
23 treatment day, four visits to monitor the response to a dose of ultra low dose IL-2,  
24 four visits to monitor the duration of response, and a final follow up visit on day 60  
25 (Figure 1). The DILT1D study has two phases: a learning phase and an adaptive  
26 phase. At the start of the study (learning phase) the first ten participants will receive  
27 doses 0.04, 0.16, 0.6, 1, 1.5 X 10<sup>6</sup> IU/m<sup>2</sup> of IL-2, in ascending order with each of  
28 the doses being given to two patients before escalating the dose, and with at least a  
29 week between pairs of recruits. In the subsequent adaptive phase the data will be  
30 analysed sequentially after each subject is observed by fitting a candidate set of  
31 statistical models to the dose-response curve. Each model will provide an estimate  
32 and standard error (SE) of the doses that achieve the two targets of a minimum  
33 Treg increase and a therapeutic Treg increase. Each model will also provide a  
34 recommended dose to assign to the next patient. The choice of doses will be  
35 approved by a Dose Determining Committee (DDC) in the light of the reports and  
36 recommendations provided. The maximum dose of IL-2 that can be assigned is 1.5  
37 X 10<sup>6</sup> IU/m<sup>2</sup>. The study has been approved by Health Research Authority, National  
38 Regulatory Ethics Service (13/EE/0020).

### 39 40 41 **Dose Determining Committee**

42 The scope of the DDC is to review the interim analysis after the first ten trial  
43 participants and then provide decisions regarding the choice of dose to administer to  
44 subsequent participants. The DDC will also review all safety data accumulated in  
45 the trial at each meeting. The DDC ~~is~~ will be comprised of a statistician, physician  
46 and scientist drawn from the members of the Trial Management Committee or  
47 named in the trial delegation log. More than one member from each role  
48 (statistician, physician and scientist) can attend the meeting but each role is only  
49 allowed a single vote at the DDC meeting. A statistician, a clinician, and a scientist  
50 are required to attend to reach a quorate. Decisions at the DDC meeting can be  
51 reached by a majority vote. The Trial Steering Committee can be called upon by the  
52 Chair to review any decisions that cannot be agreed upon if requested to by other  
53 member(s) of the DDC. Given the safety role of the DDC, the Chair is the Chief  
54  
55  
56  
57  
58  
59  
60

Investigator or if unavailable, the Chief Investigator may delegate the chair to another physician.

After the tenth participant has completed seven days of follow up after administration of the drug, data will be extracted from the trial database and analyzed. The interim analysis will be performed by the members of the Trial Management Committee and will be delivered to the DDC within ten working days of this date for review. Following the interim analysis, data will be extracted from the trial database after each patient has completed seven days of follow-up. A report generated from the data will be delivered to the DDC within one to two working days of this date, the tight timelines enabling the next dose to be prescribed for a patient treated at the start of the following week.

The report generated from the data by the trial statistician for the DDC to review will include: plots of all the patient profiles (Treg response versus time); plots of the sequence of doses; a scatter plot of the primary endpoint (maximal percentage change of Treg, log-transformed) versus dose; the same scatter plot of the primary endpoint versus dose with superimposed fitted models with 95% confidence bands for a list of statistical models; estimated target doses and confidence intervals; residual plots of each model fitted; raw output from statistical packages to double-check on convergence; and finally a choice of dose decisions for future patients. The statistical models will initially include: Linear, Quadratic, Cubic, Emax, Emax4 (four parameter) and Logistic (four parameter).

### **Study participants and recruitment**

Potential participants will need to provide written informed consent before undergoing any trial related procedures, including screening. Eligible Participants will have a history of T1D with a duration of diabetes less than 24 months from diagnosis and be positive for at least one autoantibody (Box 1). Participants will be excluded if they have a history or evidence of severe organ dysfunction, unstable type 1 diabetes, pregnancy, malignancy, active autoimmune thyroid disease, active clinical infection, hepatitis B or C, HIV and/or organ transplantation (Box 2).

Potential participants can be informed of the study by several different systems depending on geographical location and participant preference. For local recruitment potential participants will be identified by their treating physicians, diabetes nurses and research nurses at Addenbrooke's hospital or approved patient information sites. The contact details of identified potential participants, with their agreement, will be passed to the study team. For national recruitment participants who have registered with the ADDRESS-2 register [24] or the D-GAP study [25] will be contacted to determine if they are interested in enrolling in the study. Details of the study will also be provided to patient groups and charities and will be posted on [www.clinical-trials-type1-diabetes.com](http://www.clinical-trials-type1-diabetes.com). There will also be a Facebook page and twitter feed for this study.

### **The DILT1D study outcome measures**

1  
2  
3  
4  
5  
6  
7 The primary endpoint is based upon the percentage of CD4<sup>+</sup> T regulatory (defined as  
8 CD3<sup>+</sup>CD4<sup>+</sup>CD25<sup>high</sup>CD127<sup>low</sup>) cells within the CD3<sup>+</sup> CD4<sup>+</sup> T cell gate following  
9 treatment with IL-2 as measured by Fluorescence activated cell sorting (FACS). The  
10 maximum value observed in each patient's profile over the first seven days of the  
11 follow-up period will be identified and the percentage change from the baseline  
12 value defines the primary endpoint.

13 The following secondary outcomes will be measured following IL-2 treatment:

- 14 • Change in T regulatory cell number, phenotype and proliferation will be  
15 measured by FACS.
- 16 • Change in T regulatory cell epigenetic profile.
- 17 • Change in T effector cell number, proliferation and phenotype will be  
18 measured by FACS.
- 19 • Change in lymphocyte cell number, proliferation and phenotype subsets and  
20 NK and NKT cells will be measured by FACS and full blood count.
- 21 • Change in cytokines and soluble receptors
- 22 • Change in metabolic control as measured by self-monitoring of blood glucose  
23 (SMBG), laboratory measurement of blood glucose and HbA1c and C-peptide.

24  
25  
26 The following exploratory endpoints will be measured:

- 27 • Change in intracellular T and NK cell signaling will be measured ex vivo by  
28 FACS following IL-2 treatment. An in vitro dose response to IL-2 will also be  
29 performed to assess durable changes in intracellular T cell signaling.
- 30 • Change in Treg function will be measured by T cell suppression assay.
- 31 • Change in T cell, NK and peripheral blood mononuclear cell gene expression.
- 32 • Subjects will be characterized for genotypes at type 1 diabetes susceptibility  
33 genes related to the IL-2 pathway.

#### 34 35 36 37 38 39 40 Safety assessments

41 Safety and tolerability assessments will include clinical history, insulin use, physical  
42 examination, temperature, blood pressure, heart rate, 12-Lead electrocardiogram  
43 (ECGs), glucose, HbA1c, clinical laboratory tests and adverse event recording.

#### 44 45 46 **Fluorescence activated cell sorting measurements and mechanistic analysis**

47 The FACS for T regulatory cell (CD3, CD4, CD25, CD127) counts and proportions  
48 (%) that define the primary endpoint will be performed at the Department of  
49 Immunology, Addenbrooke's Hospital, Cambridge, a clinical laboratory that has been  
50 approved for good clinical practice (GCP). This assay will be carried out in a blinded  
51 fashion without the operators knowing the dose allocation for participants. The non  
52 clinical mechanistic analysis for the secondary and exploratory endpoints for FACS  
53 immunophenotyping, Treg epigenetics, intracellular T and NK cell signaling, T cell  
54



function genotype, gene expression analysis will be performed at the JDRF/Wellcome Trust Diabetes and Inflammation Laboratory (DIL), Cambridge Institute of Medical Research, University of Cambridge, Cambridge.

### Statistical methods

As an exploratory dose-finding study a formal sample size calculation is not appropriate. Simulation work shows that a sample size of 40 patients will give informative estimates of the target doses, assuming the underlying dose-response relationship can achieve the target responses within a safe range of doses and the between-patient variability does not dominate the dose-response relationship too much to be of practical clinical use.

A dose-response curve describing the relationship between the primary endpoint and the dose will be fitted for a selection of parametric models. Estimates and standard errors for all parameters, including the inter-patient variability, will be provided for all models, as well as an assessment of the goodness-of-fit for each model[26]. An estimate, standard error, and 95% confidence intervals will be produced for the doses associated with each of the different modelling assumptions that achieve the target response rates

The target response rates are those that achieve a:

1. Minimal Treg increase
2. Maximal Treg increase

However the numerical values that define these increases will only be defined in the light of the data provided by the initial ten subjects. After analysis by the DDC and following review by the TSC) these targets will be fixed for the course of the trial.

Summary statistics of all endpoints measured at baseline will be produced. Continuous variables will report sample size, mean, standard deviation, median, minimum and maximum. Categorical or binary variables will report sample size, counts, and percentages.

All secondary and exploratory endpoints measured after treatment will be explored using graphical methods, such as scatter plots, to examine their relationship to dose and other explanatory endpoints measured at baseline. A regression framework will be used to quantify such relationships, allowing for adjustments for baseline covariates and time-point; transformations of the response variable will be made where appropriate, and allowances for correlations within subjects and/or within related endpoints will be made.

## Discussion

Previous clinical trials involving the treatment of patients with newly diagnosed T1D with potential immunotherapeutics have embarked on large proof of concept trials without first establishing the correct dose of the experimental agent in order to achieve the desired immunological outcome. Doses have been usually derived from experience of an agent in another disease entity such as in the case of teplizumab (non-Fc-binding anti-CD3) where the dose used in T1D is the same as that used in renal transplantation (OKT3)[27]. Similarly, the doses of rituximab (anti-CD20) and abatacept (CTLA-4Ig) when used to treat T1D have been derived from clinical experience in rheumatoid arthritis[28-31]. In the case of otelexizumab (non-FcR-binding anti-CD3), experience from murine models was combined with limited human data to arrive at a dose. This has led, despite considerable efforts, to suboptimal outcomes in clinical trials of these agents; and in the case of otelexizumab, a complete failure due to a lack of therapeutic effect in humans[32].

It is clear that new strategies need to be developed to rapidly determine the mechanisms of action of immunotherapeutic agents in patients with type 1 diabetes prior to embarking on large phase II/III clinical trials.

The main goals of this adaptive mechanistic trial are: To establish the best doses of IL-2 to administer in patients with T1D in order to:

- a. induce a minimal Treg increase
- b. induce a maximal Treg increase

Secondary goals are:

1. To determine the duration of Treg response from a single dose of IL-2
2. To investigate the utility of biomarkers of IL-2 responsiveness in treated individuals

Administration of a single ultra low dose of IL-2 to patients with T1D will enable the determination of the response of the Treg population in this disease. By monitoring the Treg population over subsequent days and weeks we can determine the duration of the Treg population increase in frequency and function and the return to baseline. It is essential that the optimal dose and duration of response of Tregs be established in T1D prior to the initiation of any future trials of IL-2. Both the dose and the frequency of dosing will determine if aldesleukin is clinically acceptable for the long term treatment of T1D. An empirically derived dose based on experience in other diseases may not be beneficial in T1D since both the treatment protocols used in GVHD and HCV vasculitis gave a large rise in Treg population (8 and 4 fold rise in Tregs from baseline, respectively) and alterations of Treg frequency is not a feature of T1D. Our aim in T1D will be cause a small or physiological (0-0.25 fold) ~~and~~ sustained increase in Treg frequency and function that may be maintained over the

1  
2  
3  
4  
5  
6  
7 long term to induce tolerance to insulin-producing pancreatic beta cells. This trial will  
8 provide the opportunity to determine the minimum dose of IL-2 that could be used  
9 to initiate treatment of patients with newly diagnosed T1D, and, in the future, to test  
10 the possibility that ULD IL-2 can prevent the onset of autoimmunity, which occurs  
11 many years before disease diagnosis. In addition, it will provide data regarding the  
12 duration of Treg response which can be used to estimate the frequency of IL-2  
13 dosing in future trials.

14  
15 An adaptive trial design is well suited to determine the dose response of Tregs to IL-  
16 2 therapy. Tregs are an appropriate biomarker since they are highly responsive to  
17 IL-2 therapy in humans at ULD and defects in their function are key to the  
18 development of T1D. By use of an adaptive design, following the learning phase of  
19 the trial where the first ten start-up patients receive pre-specified doses, Treg data  
20 from each subject treated can be used to inform the IL-2 dose administered to  
21 subsequent individuals in the trial thereby more efficiently accessing the dose  
22 outcome relationship. In this manner Treg data from all patients enrolled will be  
23 used. Compared to a standard dosing trial an adaptive design has the advantage of  
24 not having to make definitive decisions prior to trial regarding dose and allocation to  
25 pre designated treatment groups.

26  
27 By targeting the IL-2 pathway, one of the key aetiological pathways causing  
28 susceptibility to T1D, it will be possible to examine if IL-2 therapy rectifies known  
29 deficiencies by analysis of associated biomarkers. Individual subjects will have their  
30 T cell subsets followed longitudinally and characterised by deep immunophenotyping  
31 before and after treatment to determine the effects on CD25 and FOXP3 expression.  
32 Monitoring for increased proliferation (Ki-67) and the emergence of recent thymic  
33 emigrants (CD31<sup>+</sup> cells, increased T cell receptor excision circles) will be performed.  
34 The stability of Tregs will be determined by phenotype (FOXP3, CTLA-4) and by  
35 epigenetic analysis of the regulatory regions of FOXP3 and genes associated with  
36 Treg function. Measurement of intracellular pSTAT5 signaling in lymphocytes will  
37 establish if qualitative defects in IL-2 signaling in T1D are corrected by therapy.  
38 Analysis of this panel of biomarkers may determine if individual or combinations of  
39 assays may be useful in future trials to stratify T1D patients on their ability to  
40 respond to IL-2 treatment.  
41  
42  
43  
44

#### 45 **Acknowledgments**

46  
47 The authors acknowledge the assistance and support of the Cambridge Clinical Trial  
48 Unit for trial co-ordination. The NIHR Wellcome Trust Clinical Research Facility,  
49 [Addenbrooke's Centre for Clinical Investigation \(ACCI\)](#) for clinical facilities. Sarah  
50 Nutland and Simon Hacking at the Cambridge BioResource for assistance will study  
51 set up and publicity. Helen Stevens, Vin Everett and Sundeep Nanuwa for logistical  
52 and web development at JDRF/Wellcome Trust Diabetes and Inflammation  
53 Laboratory, Cambridge Institute for Medical Research. The generous participation  
54 and contributions of the volunteers in the study are very gratefully acknowledged  
55  
56  
57  
58  
59  
60

## Competing interests

FWL has received fees for consulting on type 1 diabetes from GlaxoSmithKline and funds to support research from F Hoffmann-La Roche.

## Funding

This work ~~was~~<sup>is</sup> funded by the JDRF (9-2011-253), the Wellcome Trust (091157) and the National Institute for Health Research (NIHR) Cambridge Biomedical Research Centre. The research leading to these results has received funding from the European Union's 7th Framework Programme (FP7/2007-2013) under grant agreement no. 241447 (NAIMIT). The Cambridge Institute for Medical Research (CIMR) is in receipt of a Wellcome Trust Strategic Award (100140).

## Contributors

FWL is the chief investigator of the study, led protocol development, REC submission and presentation, design of study governance and wrote the manuscript. PK, KI and MW contributed to protocol development and coordinated REC application. SB and AW developed the statistical design for the study and wrote the statistical sections of the protocol. LW, JT and FWL had the original idea for the study and coordinated the assay development for the study. All authors reviewed the protocol.

## **Ethical Approval, trial registration and commencement of enrolment**

Formatted: Font: Bold

Ethical approval for the study was granted 18th February 2013 by the Health Research Authority, National Regulatory Ethics Service (13/EE/0020). The trial was approved for inclusion in clinical research network portfolio (Diabetes Research Network 767) on the 21<sup>st</sup> of January 2013. The trial was registered with International Standard Randomised Controlled Trial Number Register (ISRCTN27852285) on 26th of March 2013 and at ClinicalTrials.gov (NCT01827735) on the 4th of April 2013. The first participant was consented on the 8th of March 2013.

Formatted: Superscript

## References

1. Patterson CC, Dahlquist GG, Gyurus E, et al. Incidence trends for childhood type 1 diabetes in Europe during 1989-2003 and predicted new cases 2005-20: a multicentre prospective registration study. *Lancet* 2009;**373**(9680):2027-33 doi: S0140-6736(09)60568-7 [pii] 10.1016/S0140-6736(09)60568-7 [doi][published Online First: Epub Date].
2. Daneman D. Type 1 diabetes. *Lancet* 2006;**367**(9513):847-58 doi: S0140-6736(06)68341-4 [pii] 10.1016/S0140-6736(06)68341-4 [doi][published Online First: Epub Date].
3. Group DCaCTR. The effect of intensive treatment of diabetes on the development and progression of long-term complications in insulin-dependent diabetes mellitus. The Diabetes Control and Complications Trial Research Group. *N Engl J Med* 1993;**329**(14):977-86
4. Group DCaCTR. Hypoglycemia in the Diabetes Control and Complications Trial. *Diabetes* 1997;**46**(2):271-86

- 1
- 2
- 3
- 4
- 5
- 6
- 7 5. Steffes MW, Sibley S, Jackson M, et al. Beta-cell function and the development of diabetes-related complications in the diabetes control and complications trial. *Diabetes Care* 2003;**26**(3):832-6
- 8
- 9
- 10 6. Todd JA. Etiology of type 1 diabetes. *Immunity* 2010;**32**(4):457-67 doi: S1074-7613(10)00126-3 [pii]10.1016/j.immuni.2010.04.001[published Online First: Epub Date]].
- 11
- 12 7. Todd JA, Walker NM, Cooper JD, et al. Robust associations of four new chromosome regions from genome-wide analyses of type 1 diabetes. *Nat Genet* 2007;**39**(7):857-64 doi: ng2068 [pii]10.1038/ng2068[published Online First: Epub Date]].
- 13
- 14 8. Dendrou CA, Plagnol V, Fung E, et al. Cell-specific protein phenotypes for the autoimmune locus IL2RA using a genotype-selectable human bioresource. *Nat Genet* 2009;**41**(9):1011-5 doi: ng.434 [pii] 10.1038/ng.434[published Online First: Epub Date]].
- 15
- 16 9. Yamanouchi J, Rainbow D, Serra P, et al. Interleukin-2 gene variation impairs regulatory T cell function and causes autoimmunity. *Nat Genet* 2007;**39**(3):329-37 doi: ng1958 [pii]10.1038/ng1958[published Online First: Epub Date]].
- 17
- 18 10. Delgoffe GM, Kole TP, Zheng Y, et al. The mTOR kinase differentially regulates effector and regulatory T cell lineage commitment. *Immunity* 2009;**30**(6):832-44 doi: S1074-7613(09)00237-4 [pii]10.1016/j.immuni.2009.04.014[published Online First: Epub Date]].
- 19
- 20 11. Burchill MA, Yang J, Vogtenhuber C, et al. IL-2 receptor beta-dependent STAT5 activation is required for the development of Foxp3+ regulatory T cells. *J Immunol* 2007;**178**(1):280-90 doi: 178/1/280 [pii][published Online First: Epub Date]].
- 21
- 22 12. Dendrou CA, Wicker LS. The IL-2/CD25 pathway determines susceptibility to T1D in humans and NOD mice. *J Clin Immunol* 2008;**28**(6):685-96 doi: 10.1007/s10875-008-9237-9[published Online First: Epub Date]].
- 23
- 24 13. Doyle MV, Lee MT, Fong S. Comparison of the biological activities of human recombinant interleukin-2(125) and native interleukin-2. *J Biol Response Mod* 1985;**4**(1):96-109
- 25
- 26 14. Fyfe G, Fisher RI, Rosenberg SA, et al. Results of treatment of 255 patients with metastatic renal cell carcinoma who received high-dose recombinant interleukin-2 therapy. *J Clin Oncol* 1995;**13**(3):688-96
- 27
- 28 15. Rosenberg SA, Yang JC, White DE, et al. Durability of complete responses in patients with metastatic cancer treated with high-dose interleukin-2: identification of the antigens mediating response. *Ann Surg* 1998;**228**(3):307-19
- 29
- 30 16. Negrier S, Escudier B, Lasset C, et al. Recombinant human interleukin-2, recombinant human interferon alfa-2a, or both in metastatic renal-cell carcinoma. *Groupe Français d'Immunothérapie. N Engl J Med* 1998;**338**(18):1272-8 doi: 10.1056/NEJM199804303381805[published Online First: Epub Date]].
- 31
- 32 17. Yang JC, Sherry RM, Steinberg SM, et al. Randomized study of high-dose and low-dose interleukin-2 in patients with metastatic renal cancer. *J Clin Oncol* 2003;**21**(16):3127-32 doi: JCO.2003.02.122 [pii]10.1200/JCO.2003.02.122[published Online First: Epub Date]].
- 33
- 34 18. Abrams D, Lévy Y, Losso MH, et al. Interleukin-2 therapy in patients with HIV infection. *N Engl J Med* 2009;**361**(16):1548-59 doi: 361/16/1548 [pii]10.1056/NEJMoa0903175[published Online First: Epub Date]].
- 35
- 36 19. Rabinovitch A, Suarez-Pinzon WL, Shapiro AM, et al. Combination therapy with sirolimus and interleukin-2 prevents spontaneous and recurrent autoimmune diabetes in NOD mice. *Diabetes* 2002;**51**(3):638-45
- 37
- 38 20. Turnquist HR, Raimondi G, Zahorchak AF, et al. Rapamycin-conditioned dendritic cells are poor stimulators of allogeneic CD4+ T cells, but enrich for antigen-specific Foxp3+ T regulatory cells and promote organ transplant tolerance. *J Immunol* 2007;**178**(11):7018-31 doi: 178/11/7018 [pii][published Online First: Epub Date]].
- 39
- 40 21. Long SA, Rieck M, Sanda S, et al. Rapamycin/IL-2 Combination Therapy in Patients with Type 1 Diabetes Augments Tregs yet Transiently Impairs  $\beta$ -Cell Function. *Diabetes* 2012 doi: db12-0049 [pii]10.2337/db12-0049[published Online First: Epub Date]].
- 41
- 42
- 43
- 44
- 45
- 46
- 47
- 48
- 49
- 50
- 51
- 52
- 53
- 54
- 55
- 56
- 57
- 58
- 59
- 60

- 1  
2  
3  
4  
5  
6  
7  
8  
9  
10  
11  
12  
13  
14  
15  
16  
17  
18  
19  
20  
21  
22  
23  
24  
25  
26  
27  
28  
29  
30  
31  
32  
33  
34  
35  
36  
37
22. Koreth J, Matsuoka K, Kim HT, et al. Interleukin-2 and regulatory T cells in graft-versus-host disease. *N Engl J Med* 2011;365(22):2055-66 doi: 10.1056/NEJMoa1108188[published Online First: Epub Date].
  23. Saadoun D, Rosenzweig M, Joly F, et al. Regulatory T-cell responses to low-dose interleukin-2 in HCV-induced vasculitis. *N Engl J Med* 2011;365(22):2067-77 doi: 10.1056/NEJMoa1105143[published Online First: Epub Date].
  24. ADDRESS2. After Diabetes Diagnosis REsearch Support System (ADDRESS). <http://wwwaddress2.org> 2014
  25. DGAP. Diabetes: Genes, auto-immunity and prevention. <http://paediatricsmedschlcamacuk/research/clinical-trials/d-gap-diabetes-genes-auto-immunity-and-prevention/> 2014
  26. Dette H, Bornkamp B, Bretz F. On the efficiency of two-stage response-adaptive designs. *Stat Med* 2012;32(10):1646-60 doi: 10.1002/sim.5555[published Online First: Epub Date].
  27. Group OMTS. A randomized clinical trial of OKT3 monoclonal antibody for acute rejection of cadaveric renal transplants. *N Engl J Med* 1985;313(6):337-42 doi: 10.1056/nejm198508083130601[published Online First: Epub Date].
  28. Pescovitz MD, Greenbaum CJ, Krause-Steinrauf H, et al. Rituximab, B-lymphocyte depletion, and preservation of beta-cell function. *N Engl J Med* 2009;361(22):2143-52 doi: 361/22/2143 [pii] 10.1056/NEJMoa0904452[published Online First: Epub Date].
  29. Kremer JM, Dougados M, Emery P, et al. Treatment of rheumatoid arthritis with the selective costimulation modulator abatacept: twelve-month results of a phase iib, double-blind, randomized, placebo-controlled trial. *Arthritis Rheum* 2005;52(8):2263-71 doi: 10.1002/art.21201 [doi][published Online First: Epub Date].
  30. Orban T, Bundy B, Becker DJ, et al. Co-stimulation modulation with abatacept in patients with recent-onset type 1 diabetes: a randomised, double-blind, placebo-controlled trial. *Lancet* 2011;378(9789):412-9 doi: S0140-6736(11)60886-6 [pii] 10.1016/S0140-6736(11)60886-6[published Online First: Epub Date].
  31. Edwards JC, Szczepanski L, Szechinski J, et al. Efficacy of B-cell-targeted therapy with rituximab in patients with rheumatoid arthritis. *N Engl J Med* 2004;350(25):2572-81 doi: 350/25/2572 [pii]10.1056/NEJMoa032534[published Online First: Epub Date].
  32. Defend-1. Trial of Otelixizumab for Adults With Newly Diagnosed Type 1 Diabetes Mellitus (Autoimmune): DEFEND-1. <http://clinicaltrials.gov/ct2/show/NCT00678886> 2010

### 38 **Box 1 Inclusion Criteria**

39  
40 Type 1 diabetes  
41 18-50 years of age  
42 Duration of diabetes less than 24 months from diagnosis  
43 At least one positive autoantibody (anti-islet cell, anti-GAD, anti-  
44 IA2, anti-ZnT8)  
45 Written informed consent

### 46 **Box 2 Exclusion Criteria**

47  
48 Hypersensitivity to aldesleukin or any of the excipients  
49 History of severe cardiac disease  
50 History of malignancy within the past 5 years (with the exception of  
51 localized carcinoma of the skin that had been resected for cure or  
52 cervical carcinoma *in situ*)  
53 History or concurrent use of immunosuppressive agents or  
54 steroids.  
55 History of unstable diabetes with recurrent hypoglycaemia  
56  
57  
58  
59  
60

1  
2  
3  
4  
5  
6  
7 Active autoimmune hyper or hypothyroidism  
8 Active clinical infection  
9 Major pre-existing organ dysfunction or previous organ allograft  
10 Females who are pregnant, lactating or intend to get pregnant during the  
11 study  
12 Males who intend to father a pregnancy during the study  
13 Donation of more than 500 ml of blood within 2 months prior to  
14 aldesleukin administration  
15 Participation in a previous therapeutic clinical trial within 2 months prior to  
16 aldesleukin administration  
17 Abnormal ECG  
18 Abnormal full blood count, chronic renal failure (Stage 3,4,5) and/or  
19 evidence impaired liver function  
20 Positive HBsAg or HepC serology or HIV test  
21 Any medical history or clinically relevant abnormality that is deemed by the  
22 principal investigator and/or medical monitor to make the patient ineligible  
23 for inclusion because of a safety concern

24 **Figure 1.** Study design for adaptive phase of DILT1D. The primary endpoint of the  
25 study is the maximum percentage increase in Tregs from baseline over the first 7  
26 days following treatment with ULD IL-2. The T regulatory data from all participants  
27 treated is then used to inform the IL-2 dose administered to subsequent participants  
28 thereby more efficiently accessing the dose outcome relationship.

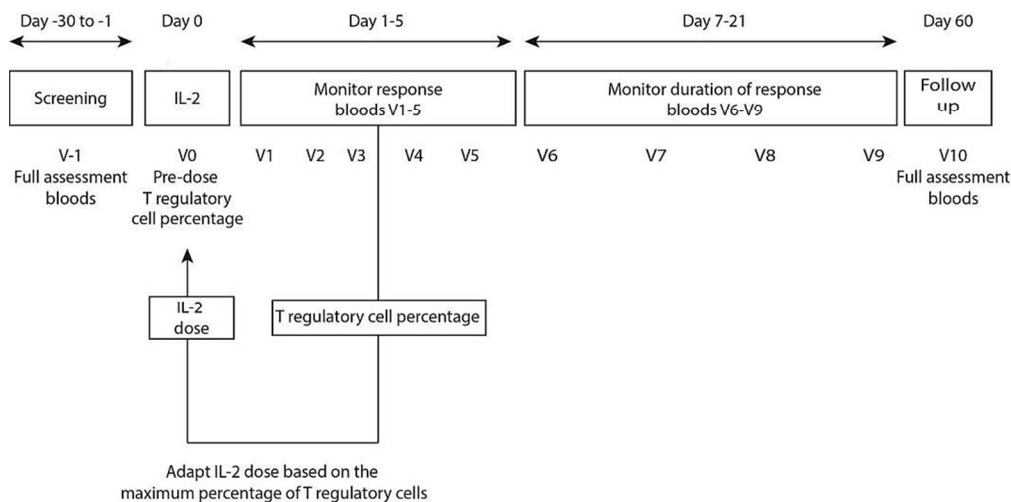

Figure 1. Study design for adaptive phase of DILT1D. The primary endpoint of the study is the maximum percentage increase in Tregs from baseline over the first 7 days following treatment with ULD IL-2. The T regulatory data from all participants treated is then used to inform the IL-2 dose administered to subsequent participants thereby more efficiently accessing the dose outcome relationship  
90x44mm (300 x 300 DPI)

review only
